# Supplementary material for: The Translational Medicine Ontology and Knowledge Base: driving personalized medicine by bridging the gap between bench and bedside
Source: PubMed Central journal article supplement (PMC3102889; doi:10.1186/2041-1480-2-s2-s1), 2011-05-17
Supplement: 2041-1480-2-S2-S1-S1.pdf [file 2041-1480-2-S2-S1-S1.pdf]

File contents:

Supplement 01 (v03) to "The Translational Medicine Ontology and Knowledge Base: Driving personalized medicine by bridging the gap between bench and bedside", Joanne S. Luciano et al., JBMS, Bio-Ontologies 2010 (2011)

Comments:

This supplement contains sample SPARQL queries relevant for the paper listed above. All of the queries are functional as of 7-Feb-2011 and return the listed results. Depending on future changes to TMO and the TMOKB, queries and results might change in the future. These queries and links to the results are also listed at:

<http://esw.w3.org/HCLSIG/PharmaOntology/Queries>.

TMO use case related queries

Q1. How many patients experienced side effects while taking Donepezil?

SPARQL

PREFIX indivo: <http://indivo.org/vocab/xml/documents#>

PREFIX trans: <tag:eric@w3.org:2009/tmo/translator#>

PREFIX foaf: <http://xmlns.com/foaf/0.1/>

```

SELECT DISTINCT(?patient) ?patient_name ?encounter_date ?symptoms ?diagnosis
?drug_name ?prescription_start
WHERE {
  GRAPH <pchr> {
    ?patient foaf:name ?patient_name .
    ?encounter trans:patient ?patient ;
      trans:reportedSymptoms ?symptoms ;
      trans:workingDiagnosis ?diagnosis ;
      trans:dateOfEncounter ?encounter_date .
    ?drug trans:prescribedTo ?patient ;
      indivo:prescribedOn ?prescription_start ;
      trans:datePrescriptionEnded ?prescription_end ;
      trans:genericName ?drug_name .
    FILTER regex(?drug_name, "DONEPEZIL", "i") .
    FILTER (?prescription_start <= ?encounter_date && ?prescription_end >=
?encounter_date) .
  }
}

```

Results

| patient                                                                                   | patient_name       | encounter_date | symptoms | diagnosis                  | drug_name                       | prescription_start |
|-------------------------------------------------------------------------------------------|--------------------|----------------|----------|----------------------------|---------------------------------|--------------------|
| <a href="http://tag:eric@w3.org:2009/pchr/1#me">http://tag:eric@w3.org:2009/pchr/1#me</a> | George Andrew Tour | 2009-08-15     | nausea   | adverse event to Donepezil | DONEPEZIL HYDROCHLORIDE TABLETS | 2009-08-10         |

Supplement 01 (v03) to "The Translational Medicine Ontology and Knowledge Base: Driving personalized medicine by bridging the gap between bench and bedside", Joanne S. Luciano et al., JBMS, Bio-Ontologies 2010 (2011)

-----  
Q2. What are the diagnostic criteria for AD?

SPARQL

```
define input:inference "infer"  
PREFIX tmo: <http://www.w3.org/2001/sw/hcls/ns/transmed/>  
PREFIX iao: <http://purl.obolibrary.org/obo/>  
PREFIX ro: <http://www.obofoundry.org/ro/ro.owl#>  
  
SELECT DISTINCT ?type_label ?criterion_label  
WHERE {  
  [] a ?type ;  
    a ?stated_type ;  
    rdfs:label ?criterion_label ;  
    iao:is_about <http://www4.wiwiss.fu-berlin.de/diseasome/resource/diseases/74> .  
  ?stated_type rdfs:label ?type_label .  
  ?stated_type rdfs:subClassOf ?type .  
  FILTER (?type = tmo:TMO_0068) .  
}  
ORDER BY DESC(?type_label) ASC(?criterion_label)
```

Results

| type_label                     | criterion_label                                                                                                                                                                                                                                                                                       |
|--------------------------------|-------------------------------------------------------------------------------------------------------------------------------------------------------------------------------------------------------------------------------------------------------------------------------------------------------|
| diagnostic inclusion criterion | Abnormal cerebrospinal fluid biomarker [dubois:7]                                                                                                                                                                                                                                                     |
| diagnostic inclusion criterion | Both clinical and genetic evidence (mutation on chromosome 1, 14, or 21) of AD [dubois:21]                                                                                                                                                                                                            |
| diagnostic inclusion criterion | Both clinical and histopathological (brain biopsy or autopsy) evidence of the disease, as required by the NIA-Reagan criteria for the post-mortem diagnosis of AD [dubois:20]                                                                                                                         |
| diagnostic inclusion criterion | Gradual and progressive change in memory function reported by patients or informants over more than 6 months [dubois:2]                                                                                                                                                                               |
| diagnostic inclusion criterion | Low amyloid $\text{A}\beta_{42}$ concentrations, increased total tau concentrations, or increased phospho-tau concentrations, or combinations of the three [dubois:8]                                                                                                                                 |
| diagnostic inclusion criterion | Objective evidence of significantly impaired episodic memory on testing: this generally consists of recall deficit that does not improve significantly or does not normalise with cueing or recognition testing and after effective encoding of information has been previously controlled [dubois:3] |

Supplement 01 (v03) to "The Translational Medicine Ontology and Knowledge Base: Driving personalized medicine by bridging the gap between bench and bedside", Joanne S. Luciano et al., JBMS, Bio-Ontologies 2010 (2011)

|                                |                                                                                                                                                                                                                                                                                                             |
|--------------------------------|-------------------------------------------------------------------------------------------------------------------------------------------------------------------------------------------------------------------------------------------------------------------------------------------------------------|
| diagnostic inclusion criterion | Presence of an early and significant episodic memory impairment [dubois:1]                                                                                                                                                                                                                                  |
| diagnostic inclusion criterion | Presence of medial temporal lobe atrophy [dubois:5]                                                                                                                                                                                                                                                         |
| diagnostic inclusion criterion | Proven AD autosomal dominant mutation within the immediate family [dubois:10]                                                                                                                                                                                                                               |
| diagnostic inclusion criterion | Reduced glucose metabolism in bilateral temporal parietal regions with PET [dubois:9]                                                                                                                                                                                                                       |
| diagnostic inclusion criterion | The episodic memory impairment can be isolated or associated with other cognitive changes at the onset of AD or as AD advances [dubois:4]                                                                                                                                                                   |
| diagnostic inclusion criterion | Volume loss of hippocampi, entorhinal cortex, amygdala evidenced on MRI with qualitative ratings using visual scoring (referenced to well characterised population with age norms) or quantitative volumetry of regions of interest (referenced to well characterised population with age norms) [dubois:6] |
| diagnostic exclusion criterion | Cerebrovascular disease [dubois:17]                                                                                                                                                                                                                                                                         |
| diagnostic exclusion criterion | Early extrapyramidal signs [dubois:13]                                                                                                                                                                                                                                                                      |
| diagnostic exclusion criterion | Early occurrence of the following symptoms: gait disturbances, seizures, behavioural changes [dubois:12]                                                                                                                                                                                                    |
| diagnostic exclusion criterion | Focal neurological features including hemiparesis, sensory loss, visual field deficits [dubois:14]                                                                                                                                                                                                          |
| diagnostic exclusion criterion | MRI FLAIR or T2 signal abnormalities in the medial temporal lobe that are consistent with infectious or vascular insults [dubois:19]                                                                                                                                                                        |
| diagnostic exclusion criterion | Major depression [dubois:16]                                                                                                                                                                                                                                                                                |
| diagnostic exclusion criterion | Non-AD dementia [dubois:15]                                                                                                                                                                                                                                                                                 |
| diagnostic exclusion criterion | Sudden onset [dubois:11]                                                                                                                                                                                                                                                                                    |
| diagnostic exclusion criterion | Toxic and metabolic abnormalities [dubois:18]                                                                                                                                                                                                                                                               |

-----

Q3. Is Donepezil covered by Medicare D?

SPARQL

define input:inference "infer"

PREFIX tmo: <<http://www.w3.org/2001/sw/hcls/ns/transmed/>>

PREFIX medicare: <<http://www4.wiwiwiss.fu-berlin.de/medicare/resource/medicare/>>

SELECT ?label

WHERE {

    GRAPH <medicare> {

        ?medicare\_drug a tmo:TMO\_0001 .

Supplement 01 (v03) to "The Translational Medicine Ontology and Knowledge Base: Driving personalized medicine by bridging the gap between bench and bedside", Joanne S. Luciano et al., JBMS, Bio-Ontologies 2010 (2011)

```

    ?medicare_drug rdfs:label ?label .
    FILTER regex(?label, "donepezil", "i") .
  }
}

```

Results

|                                       |
|---------------------------------------|
| label                                 |
| Aricept (Donepezil Hydrochloride)     |
| Aricept ODT (Donepezil Hydrochloride) |

-----

Q4. Have any of my AD patients been treated for other neurological conditions as this might impact their diagnosis?

SPARQL

```

PREFIX indivo: <http://indivo.org/vocab/xml/documents#>
PREFIX trans: <tag:eric@w3.org:2009/tmo/translator#>
PREFIX foaf: <http://xmlns.com/foaf/0.1/>

```

```

SELECT DISTINCT(?patient) ?patient_name
WHERE {
  GRAPH <pchr> {
    ?patient foaf:name ?patient_name .
    [
      trans:patient ?patient ;
      trans:reportedSymptoms ?symptoms ;
    ]
    FILTER regex(?symptoms, "depression", "i") .
    #ICD9 of 331 - alzheimer disease
    ?patient trans:hasCondition [ trans:ICD9 "331" ; ] .
  }
}

```

Results

|                                       |                  |
|---------------------------------------|------------------|
| patient                               | patient_name     |
| http://tag:eric@w3.org:2009/pchr/2#me | Monica Mary Mall |

-----

Q5. Are there other clinical trials that my patient may participate in for AD which have a different mechanism of action to the patient's current drug because it caused side effects?

A5.1. 569 clinical trials which involve AD are known. 181 trials are enrolling by invitation or recruiting patients.

## SPARQL

PREFIX linkedct: <http://data.linkedct.org/resource/linkedct/>

PREFIX drugbank: <http://www4.wiwiss.fu-berlin.de/drugbank/resource/drugbank/>

```
SELECT ?trial_status, count(*)
WHERE {
  ?trial ?type linkedct:trials .
  ?trial linkedct:overall_status ?trial_status .
  ?trial linkedct:condition ?condition .
  ?condition linkedct:condition_name ?condition_name .
  FILTER regex(?condition_name, "alzheimer", "i") .
}
```

## Results

| trial_status            | callret-1 |
|-------------------------|-----------|
| Enrolling by invitation | 12        |
| Active, not recruiting  | 72        |
| Withdrawn               | 1         |
| Completed               | 263       |
| Suspended               | 2         |
| Recruiting              | 169       |
| Terminated              | 31        |
| Not yet recruiting      | 19        |

A5.2. 72 active clinical trials involve AD.

## SPARQL

PREFIX linkedct: <http://data.linkedct.org/resource/linkedct/>

PREFIX drugbank: <http://www4.wiwiss.fu-berlin.de/drugbank/resource/drugbank/>

```
SELECT count(*)
WHERE {
  ?trial ?type linkedct:trials .
  ?trial linkedct:overall_status ?trial_status .
  ?trial linkedct:condition ?condition .
  ?condition linkedct:condition_name ?condition_name .
  FILTER regex(?trial_status, "active", "i") .
  FILTER regex(?condition_name, "alzheimer", "i") .
}
```

## Results

|           |
|-----------|
| callret-0 |
| 72        |

A5.3. 2 drugs targeting AD with established mechanism of action are in clinical trials.

Supplement 01 (v03) to "The Translational Medicine Ontology and Knowledge Base: Driving personalized medicine by bridging the gap between bench and bedside", Joanne S. Luciano et al., JBMS, Bio-Ontologies 2010 (2011)

## SPARQL

PREFIX linkedct: <http://data.linkedct.org/resource/linkedct/>

PREFIX drugbank: <http://www4.wiwiss.fu-berlin.de/drugbank/resource/drugbank/>

```
SELECT ?name ?moa
WHERE {
  ?trial ?type linkedct:trials .
  ?trial linkedct:overall_status ?trial_status .
  ?trial linkedct:condition ?condition .
  ?condition linkedct:condition_name ?condition_name .
  ?trial linkedct:intervention ?ldrug .
  ?ldrug linkedct:intervention_name ?name .
  ?ddrug owl:sameAs ?ldrug .
  ?ddrug drugbank:mechanismOfAction ?moa .
  FILTER regex(?trial_status, "active", "i") .
  FILTER regex(?condition_name, "alzheimer", "i") .
}
```

## Results

| name         | moa                                                                                                                                                                                                                                                                                                                                                                                                                                                                                                                   |
|--------------|-----------------------------------------------------------------------------------------------------------------------------------------------------------------------------------------------------------------------------------------------------------------------------------------------------------------------------------------------------------------------------------------------------------------------------------------------------------------------------------------------------------------------|
| placebo      | Alkylating agents work by three different mechanisms: 1) attachment of alkyl groups to DNA bases, resulting in the DNA being fragmented by repair enzymes in their attempts to replace the alkylated bases, preventing DNA synthesis and RNA transcription from the affected DNA, 2) DNA damage via the formation of cross-links (bonds between atoms in the DNA) which prevents DNA from being separated for synthesis or transcription, and 3) the induction of mispairing of the nucleotides leading to mutations. |
| rivastigmine | Rivastigmine increases the concentration of acetylcholine through reversible inhibition of its hydrolysis by cholinesterase. This acts to enhance cholinergic function.                                                                                                                                                                                                                                                                                                                                               |

-----

Q6. Are there any AD patients without the APOE4 allele as these would be good candidates for the clinical trial involving Bapineuzumab?

## SPARQL

PREFIX trans: <tag:eric@w3.org:2009/tmo/translator#>

PREFIX foaf: <http://xmlns.com/foaf/0.1/>

Supplement 01 (v03) to "The Translational Medicine Ontology and Knowledge Base: Driving personalized medicine by bridging the gap between bench and bedside", Joanne S. Luciano et al., JBMS, Bio-Ontologies 2010 (2011)

```

SELECT DISTINCT ?name ?patient
WHERE {
  ?patient trans:hasCondition [ trans:diagnosedWith trans:alzheimers_disease ] ;
  foaf:name ?name .
  OPTIONAL {
    ?encounter trans:test [
      a ?testname ;
      trans:result ?result
    ].
    ?result trans:feature trans:variant_APOE4 ;
    trans:present true .
  }
  FILTER ( !bound(?result) ) .
}

```

### Results

| name                 | patient                                                                                   |
|----------------------|-------------------------------------------------------------------------------------------|
| Benny Smith          | <a href="http://tag.eric@w3.org:2009/pchr/3#me">http://tag.eric@w3.org:2009/pchr/3#me</a> |
| Georg Steffen Möller | <a href="http://tag.eric@w3.org:2009/pchr/5#me">http://tag.eric@w3.org:2009/pchr/5#me</a> |

-----

Q7. What active trials are ongoing that would be a good fit for Patient 2?

### SPARQL

```

PREFIX linkedct: <http://data.linkedct.org/resource/linkedct/>
PREFIX trans: <tag.eric@w3.org:2009/tmo/translator#>

```

```

SELECT DISTINCT(?trial) ?trial_condition_name ?trial_title
WHERE {
  ?trial linkedct:brief_title ?trial_title .
  ?trial linkedct:overall_status ?status .
  FILTER regex(?status, "Active") .
  ?trial linkedct:condition ?trial_condition .
  ?trial_condition linkedct:condition_name ?trial_condition_name .
  FILTER (
    regex(?trial_condition_name, "alzheimer", "i")
    || regex(?trial_condition_name, "anxiety", "i")
    || regex(?trial_condition_name, "hypercholesterolaemia", "i")
    || regex(?trial_condition_name, "depression", "i")
    || regex(?trial_condition_name, "mild cognitive impairment", "i")
    || regex(?trial_condition_name, "myocardial infarction", "i")
  ) .
}

```

### Results

Supplement 01 (v03) to "The Translational Medicine Ontology and Knowledge Base: Driving personalized medicine by bridging the gap between bench and bedside", Joanne S. Luciano et al., JBMS, Bio-Ontologies 2010 (2011)

| trial                                                                                                                   | trial_condition_name                      | trial_title                                                                                                                                      |
|-------------------------------------------------------------------------------------------------------------------------|-------------------------------------------|--------------------------------------------------------------------------------------------------------------------------------------------------|
| <a href="http://data.linkedct.org/resource/trials/NCT00263393">http://data.linkedct.org/resource/trials/NCT00263393</a> | * Myocardial Infarction                   | Rural Andhra Pradesh Cardiovascular Prevention Study (RAPCAPS)                                                                                   |
| <a href="http://data.linkedct.org/resource/trials/NCT00199823">http://data.linkedct.org/resource/trials/NCT00199823</a> | Acute Anterior Wall Myocardial Infarction | Autologous Stem Cell Transplantation in Acute Myocardial Infarction                                                                              |
| <a href="http://data.linkedct.org/resource/trials/NCT00211172">http://data.linkedct.org/resource/trials/NCT00211172</a> | Acute Myocardial Infarction               | HMO Research Network CERT: Acute Myocardial Infarction                                                                                           |
| <a href="http://data.linkedct.org/resource/trials/NCT00145119">http://data.linkedct.org/resource/trials/NCT00145119</a> | Acute Myocardial Infarction               | CARISMA : Cardiac Arrhythmias and Risk Stratification After MyoCardial Infarction                                                                |
| <a href="http://data.linkedct.org/resource/trials/NCT00157768">http://data.linkedct.org/resource/trials/NCT00157768</a> | Acute Myocardial Infarction               | IRIS : Use of Implantable Defibrillator in High-Risk Patients Early After Acute Myocardial Infarction                                            |
| <a href="http://data.linkedct.org/resource/trials/NCT00161005">http://data.linkedct.org/resource/trials/NCT00161005</a> | Acute Myocardial Infarction               | Norwegian Study on District Treatment of ST-Elevation Myocardial Infarction                                                                      |
| <a href="http://data.linkedct.org/resource/trials/NCT00419198">http://data.linkedct.org/resource/trials/NCT00419198</a> | Acute Myocardial Infarction               | Clinical Outcomes of Angioplasty Postconditioning                                                                                                |
| <a href="http://data.linkedct.org/resource/trials/NCT00430885">http://data.linkedct.org/resource/trials/NCT00430885</a> | Acute Myocardial Infarction               | Effect of Intravenous Immunglobulin (IVIg) After Myocardial Infarction                                                                           |
| <a href="http://data.linkedct.org/resource/trials/NCT00623272">http://data.linkedct.org/resource/trials/NCT00623272</a> | Acute Myocardial Infarction               | Left Ventricular Function Assessment After Acute Myocardial Infarction: Comparison Between Bi-, Three-Dimensional and Cardiac Magnetic Resonance |
| <a href="http://data.linkedct.org/resource/trials/NCT00669227">http://data.linkedct.org/resource/trials/NCT00669227</a> | Acute Myocardial Infarction               | Intracoronary Stem Cell Therapy in Patients With Acute Myocardial Infarction (SCAMI)                                                             |
| <a href="http://data.linkedct.org/resource/trials/NCT00409604">http://data.linkedct.org/resource/trials/NCT00409604</a> | Acute Myocardial Infarction               | PROTECT : Pacing to Protect Heart for Damage From Blocked Heart Vessel and From re-Opening Blocked Vessel(s)                                     |
| <a href="http://data.linkedct.org/resource/trials/NCT00495664">http://data.linkedct.org/resource/trials/NCT00495664</a> | Acute Myocardial Infarction               | Titanium Nitride Oxide Coated Stents and Paclitaxel Eluting Stents for Acute Myocardial Infarction                                               |
| <a href="http://data.linkedct.org/resource">http://data.linkedct.org/resource</a>                                       | Acute Myocardial Infarction               | Counterpulsation Reduces                                                                                                                         |

Supplement 01 (v03) to "The Translational Medicine Ontology and Knowledge Base: Driving personalized medicine by bridging the gap between bench and bedside", Joanne S. Luciano et al., JBMS, Bio-Ontologies 2010 (2011)



|                                                                                                                         |                       |                                                                                                                                                                    |
|-------------------------------------------------------------------------------------------------------------------------|-----------------------|--------------------------------------------------------------------------------------------------------------------------------------------------------------------|
| /trials/NCT00833612                                                                                                     | (AMI)                 | Infarct Size Pre-PCI for AMI                                                                                                                                       |
| <a href="http://data.linkedct.org/resource/trials/NCT00399776">http://data.linkedct.org/resource/trials/NCT00399776</a> | Adolescent Depression | Bone Mineral Content and Bone Metabolism in Adolescents on Antipsychotic Therapy                                                                                   |
| <a href="http://data.linkedct.org/resource/trials/NCT00009191">http://data.linkedct.org/resource/trials/NCT00009191</a> | Alzheimer Disease     | The Depression in Alzheimer's Disease Study (DIADS)                                                                                                                |
| <a href="http://data.linkedct.org/resource/trials/NCT00094913">http://data.linkedct.org/resource/trials/NCT00094913</a> | Alzheimer Disease     | PET Changes in Alzheimer's Disease (AD)                                                                                                                            |
| <a href="http://data.linkedct.org/resource/trials/NCT00119561">http://data.linkedct.org/resource/trials/NCT00119561</a> | Alzheimer Disease     | Testing the Effectiveness of Telephone Support for Dementia Caregivers                                                                                             |
| <a href="http://data.linkedct.org/resource/trials/NCT00040378">http://data.linkedct.org/resource/trials/NCT00040378</a> | Alzheimer Disease     | Prevention of Alzheimer's Disease by Vitamin E and Selenium (PREADVISE)                                                                                            |
| <a href="http://data.linkedct.org/resource/trials/NCT00056329">http://data.linkedct.org/resource/trials/NCT00056329</a> | Alzheimer Disease     | Vitamin E in Aging Persons With Down Syndrome                                                                                                                      |
| <a href="http://data.linkedct.org/resource/trials/NCT00071721">http://data.linkedct.org/resource/trials/NCT00071721</a> | Alzheimer Disease     | Valproate in Dementia (VALID)                                                                                                                                      |
| <a href="http://data.linkedct.org/resource/trials/NCT00088673">http://data.linkedct.org/resource/trials/NCT00088673</a> | Alzheimer Disease     | Evaluation of 3APS in Patients With Mild to Moderate Alzheimer's Disease                                                                                           |
| <a href="http://data.linkedct.org/resource/trials/NCT00291161">http://data.linkedct.org/resource/trials/NCT00291161</a> | Alzheimer Disease     | Partners in Dementia Care                                                                                                                                          |
| <a href="http://data.linkedct.org/resource/trials/NCT00441987">http://data.linkedct.org/resource/trials/NCT00441987</a> | Alzheimer Disease     | Study Evaluating the Safety and Pharmacokinetics of a Single Dose of GSI-953                                                                                       |
| <a href="http://data.linkedct.org/resource/trials/NCT00506415">http://data.linkedct.org/resource/trials/NCT00506415</a> | Alzheimer Disease     | Comparative Efficacy, Safety, and Tolerability of Rivastigmine 10 and 15 cm <sup>2</sup> Patch in Patients With Alzheimer's Disease (AD) Showing Cognitive Decline |
| <a href="http://data.linkedct.org/resource/trials/NCT00547560">http://data.linkedct.org/resource/trials/NCT00547560</a> | Alzheimer Disease     | Study Evaluating Multiple Doses of GSI-953 Within the Elderly Population                                                                                           |
| <a href="http://data.linkedct.org/resource/trials/NCT00568776">http://data.linkedct.org/resource/trials/NCT00568776</a> | Alzheimer Disease     | ELND005 in Patients With Mild to Moderate Alzheimer's Disease                                                                                                      |
| <a href="http://data.linkedct.org/resource/trials/NCT00605059">http://data.linkedct.org/resource/trials/NCT00605059</a> | Alzheimer Disease     | Evaluation of [123I] AV94 and SPECT as a Marker of Beta-Amyloid Protein Deposition in Subjects With Alzheimer Disease in Comparison to Healthy                     |

Supplement 01 (v03) to "The Translational Medicine Ontology and Knowledge Base: Driving personalized medicine by bridging the gap between bench and bedside", Joanne S. Luciano et al., JBMS, Bio-Ontologies 2010 (2011)

|                                                                                                                         |                     | Subjects                                                                                                                                                 |
|-------------------------------------------------------------------------------------------------------------------------|---------------------|----------------------------------------------------------------------------------------------------------------------------------------------------------|
| <a href="http://data.linkedct.org/resource/trials/NCT00470418">http://data.linkedct.org/resource/trials/NCT00470418</a> | Alzheimer Disease   | Development of NIC5-15 in the Treatment of Alzheimer's Disease                                                                                           |
| <a href="http://data.linkedct.org/resource/trials/NCT00599469">http://data.linkedct.org/resource/trials/NCT00599469</a> | Alzheimer Disease   | Far Infrared Treatment for Alzheimer's Disease                                                                                                           |
| <a href="http://data.linkedct.org/resource/trials/NCT00733863">http://data.linkedct.org/resource/trials/NCT00733863</a> | Alzheimer Disease   | Safety and Tolerability of Repeated Subcutaneous Injections of CAD106 in Mild Alzheimer's Patients.                                                      |
| <a href="http://data.linkedct.org/resource/trials/NCT00462917">http://data.linkedct.org/resource/trials/NCT00462917</a> | Alzheimer Disease   | REVEAL III: Risk Evaluation and Education for Alzheimer's Disease                                                                                        |
| <a href="http://data.linkedct.org/resource/trials/NCT00605046">http://data.linkedct.org/resource/trials/NCT00605046</a> | Alzheimer Disease   | Evaluation of [123I] AV151 and SPECT as a Marker of Beta-Amyloid Protein Deposition in Subjects With Alzheimer Disease in Comparison to Healthy Subjects |
| <a href="http://data.linkedct.org/resource/trials/NCT00824967">http://data.linkedct.org/resource/trials/NCT00824967</a> | Alzheimer Disease   | Non Pharmacological Management of Behavioural Symptoms in Nursing Home                                                                                   |
| <a href="http://data.linkedct.org/resource/trials/NCT00979316">http://data.linkedct.org/resource/trials/NCT00979316</a> | Alzheimer Disease   | Effect on the Electrocardiographic QT Interval Corrected for Heart Rate (QTc) in Healthy Subjects                                                        |
| <a href="http://data.linkedct.org/resource/trials/NCT00627848">http://data.linkedct.org/resource/trials/NCT00627848</a> | Alzheimer' Disease  | Rivastigmine in Mild Alzheimer's Disease, FMRI Study                                                                                                     |
| <a href="http://data.linkedct.org/resource/trials/NCT00031018">http://data.linkedct.org/resource/trials/NCT00031018</a> | Alzheimer's Disease | Prevention of Cognitive Decline in Alzheimer's Disease by Ingested Interferon Alpha                                                                      |
| <a href="http://data.linkedct.org/resource/trials/NCT00087789">http://data.linkedct.org/resource/trials/NCT00087789</a> | Alzheimer's Disease | CERE-110 in Subjects With Mild to Moderate Alzheimer's Disease                                                                                           |
| <a href="http://data.linkedct.org/resource/trials/NCT00348140">http://data.linkedct.org/resource/trials/NCT00348140</a> | Alzheimer's Disease | Rosiglitazone (Extended Release Tablets) As Adjunctive Therapy In Subjects With Mild To Moderate Alzheimer's Disease                                     |
| <a href="http://data.linkedct.org/resource/trials/NCT00086138">http://data.linkedct.org/resource/trials/NCT00086138</a> | Alzheimer's Disease | Depression in Alzheimer's Disease-2                                                                                                                      |
| <a href="http://data.linkedct.org/resource/trials/NCT00106899">http://data.linkedct.org/resource/trials/NCT00106899</a> | Alzheimer's Disease | ADNI: Alzheimer's Disease Neuroimaging Initiative                                                                                                        |

Supplement 01 (v03) to "The Translational Medicine Ontology and Knowledge Base: Driving personalized medicine by bridging the gap between bench and bedside", Joanne S. Luciano et al., JBMS, Bio-Ontologies 2010 (2011)

|                                                                                                                         |                     |                                                                                                                            |
|-------------------------------------------------------------------------------------------------------------------------|---------------------|----------------------------------------------------------------------------------------------------------------------------|
| <a href="http://data.linkedct.org/resource/trials/NCT00142324">http://data.linkedct.org/resource/trials/NCT00142324</a> | Alzheimer's Disease | CALM-AD                                                                                                                    |
| <a href="http://data.linkedct.org/resource/trials/NCT00217763">http://data.linkedct.org/resource/trials/NCT00217763</a> | Alzheimer's Disease | European Study of 3APS in Mild to Moderate Alzheimer's Disease Patients                                                    |
| <a href="http://data.linkedct.org/resource/trials/NCT00239746">http://data.linkedct.org/resource/trials/NCT00239746</a> | Alzheimer's Disease | BONSAI: Biomarkers of Nonsteroidal Anti-Inflammatories                                                                     |
| <a href="http://data.linkedct.org/resource/trials/NCT00259480">http://data.linkedct.org/resource/trials/NCT00259480</a> | Alzheimer's Disease | Project ACT: Advancing Caregiving Techniques                                                                               |
| <a href="http://data.linkedct.org/resource/trials/NCT00267124">http://data.linkedct.org/resource/trials/NCT00267124</a> | Alzheimer's Disease | Brain Aging Project-- Kansas University                                                                                    |
| <a href="http://data.linkedct.org/resource/trials/NCT00299988">http://data.linkedct.org/resource/trials/NCT00299988</a> | Alzheimer's Disease | Phase II Study of Intravenous Immunoglobulin (IVIg) for Alzheimer's Disease                                                |
| <a href="http://data.linkedct.org/resource/trials/NCT00314912">http://data.linkedct.org/resource/trials/NCT00314912</a> | Alzheimer's Disease | Open-Label Extension of the Phase III Study With Tramiprosate (3APS) in Patients With Mild to Moderate Alzheimer's Disease |
| <a href="http://data.linkedct.org/resource/trials/NCT00319891">http://data.linkedct.org/resource/trials/NCT00319891</a> | Alzheimer's Disease | Computer-Based Training for Mild Alzheimer's Disease                                                                       |
| <a href="http://data.linkedct.org/resource/trials/NCT00010803">http://data.linkedct.org/resource/trials/NCT00010803</a> | Alzheimer's Disease | Ginkgo Biloba Prevention Trial in Older Individuals                                                                        |
| <a href="http://data.linkedct.org/resource/trials/NCT00174525">http://data.linkedct.org/resource/trials/NCT00174525</a> | Alzheimer's Disease | Safety Study of Passive Immunization for Patients With Mild to Moderate Alzheimer's Disease                                |
| <a href="http://data.linkedct.org/resource/trials/NCT00259467">http://data.linkedct.org/resource/trials/NCT00259467</a> | Alzheimer's Disease | Project TAP: Tailored Activities Project                                                                                   |
| <a href="http://data.linkedct.org/resource/trials/NCT00348309">http://data.linkedct.org/resource/trials/NCT00348309</a> | Alzheimer's Disease | Rosiglitazone (Extended Release Tablets) As Adjunctive Therapy For Subjects With Mild To Moderate Alzheimer's Disease      |
| <a href="http://data.linkedct.org/resource/trials/NCT00377715">http://data.linkedct.org/resource/trials/NCT00377715</a> | Alzheimer's Disease | Double-Blind, Placebo-Controlled Study of Oral Dimebon in Subjects With Mild to Moderate Alzheimer's Disease               |
| <a href="http://data.linkedct.org/resource/trials/NCT00561392">http://data.linkedct.org/resource/trials/NCT00561392</a> | Alzheimer's Disease | Clinical Effectiveness of 10 cm <sup>2</sup> Rivastigmine Patch in Patients With Alzheimer's Disease                       |

Supplement 01 (v03) to "The Translational Medicine Ontology and Knowledge Base: Driving personalized medicine by bridging the gap between bench and bedside", Joanne S. Luciano et al., JBMS, Bio-Ontologies 2010 (2011)

|                                                                                                                         |                     |                                                                                                                                                                                                  |
|-------------------------------------------------------------------------------------------------------------------------|---------------------|--------------------------------------------------------------------------------------------------------------------------------------------------------------------------------------------------|
| <a href="http://data.linkedct.org/resource/trials/NCT00622713">http://data.linkedct.org/resource/trials/NCT00622713</a> | Alzheimer's Disease | A 24 Week, Multicenter, Open, Evaluation of the Clinical Effectiveness of the Once-Daily 10 cm <sup>2</sup> Rivastigmine Patch Formulation in Patients With Probable Alzheimer's Disease (EXTRA) |
| <a href="http://data.linkedct.org/resource/trials/NCT00626613">http://data.linkedct.org/resource/trials/NCT00626613</a> | Alzheimer's Disease | The Relationship Between Risperdal Treatment and Quality of Life in Patients With Alzheimer's Disease and Behavioural and Psychological Symptoms of Dementia (BPSD)                              |
| <a href="http://data.linkedct.org/resource/trials/NCT00675623">http://data.linkedct.org/resource/trials/NCT00675623</a> | Alzheimer's Disease | A Safety and Efficacy Study of Oral Dimebon in Patients With Mild-To-Moderate Alzheimer's Disease                                                                                                |
| <a href="http://data.linkedct.org/resource/trials/NCT00684944">http://data.linkedct.org/resource/trials/NCT00684944</a> | Alzheimer's Disease | Open Label Study of TRx0014 in Alzheimer's Disease                                                                                                                                               |
| <a href="http://data.linkedct.org/resource/trials/NCT00381238">http://data.linkedct.org/resource/trials/NCT00381238</a> | Alzheimer's Disease | Open-Label Extension Assessing Long-Term Safety Of Rosiglitazone In Subjects With Mild To Moderate Alzheimer's Disease                                                                           |
| <a href="http://data.linkedct.org/resource/trials/NCT00388544">http://data.linkedct.org/resource/trials/NCT00388544</a> | Alzheimer's Disease | Enhancing Quality of Life for Nursing Home Residents                                                                                                                                             |
| <a href="http://data.linkedct.org/resource/trials/NCT00440050">http://data.linkedct.org/resource/trials/NCT00440050</a> | Alzheimer's Disease | DHA (Docosahexaenoic Acid), an Omega 3 Fatty Acid, in Slowing the Progression of Alzheimer's Disease                                                                                             |
| <a href="http://data.linkedct.org/resource/trials/NCT00480701">http://data.linkedct.org/resource/trials/NCT00480701</a> | Alzheimer's Disease | Evaluation of 123-I Iodobenzovesamicol (IBVM) and SPECT Imaging of Healthy Subjects and Patients With Alzheimer's Disease                                                                        |
| <a href="http://data.linkedct.org/resource/trials/NCT00546767">http://data.linkedct.org/resource/trials/NCT00546767</a> | Alzheimer's Disease | Home-Based Assessment for Alzheimer Disease Prevention                                                                                                                                           |
| <a href="http://data.linkedct.org/resource/trials/NCT00566501">http://data.linkedct.org/resource/trials/NCT00566501</a> | Alzheimer's Disease | Open-Label Extension Study of 23 mg Donepezil SR in Patients With                                                                                                                                |

Supplement 01 (v03) to "The Translational Medicine Ontology and Knowledge Base: Driving personalized medicine by bridging the gap between bench and bedside", Joanne S. Luciano et al., JBMS, Bio-Ontologies 2010 (2011)

|                                                                                                                         |                     |                                                                                                                                                        |
|-------------------------------------------------------------------------------------------------------------------------|---------------------|--------------------------------------------------------------------------------------------------------------------------------------------------------|
|                                                                                                                         |                     | Moderate to Severe Alzheimer's Disease                                                                                                                 |
| <a href="http://data.linkedct.org/resource/trials/NCT00581867">http://data.linkedct.org/resource/trials/NCT00581867</a> | Alzheimer's Disease | Memory and Insulin in Early Alzheimer's Disease                                                                                                        |
| <a href="http://data.linkedct.org/resource/trials/NCT00627029">http://data.linkedct.org/resource/trials/NCT00627029</a> | Alzheimer's Disease | Evaluation of Programs of Coordinated Care and Disease Management                                                                                      |
| <a href="http://data.linkedct.org/resource/trials/NCT00704782">http://data.linkedct.org/resource/trials/NCT00704782</a> | Alzheimer's Disease | Study of Combination Therapy With Dimebon and Donepezil (Aricept) in Patients With Alzheimer's Disease                                                 |
| <a href="http://data.linkedct.org/resource/trials/NCT00438568">http://data.linkedct.org/resource/trials/NCT00438568</a> | Alzheimer's Disease | SNIFF 120: Study of Nasal Insulin to Fight Forgetfulness (120 Days)                                                                                    |
| <a href="http://data.linkedct.org/resource/trials/NCT00478205">http://data.linkedct.org/resource/trials/NCT00478205</a> | Alzheimer's Disease | Comparison of 23 mg Donepezil Sustained Release (SR) to 10 mg Donepezil Immediate Release (IR) in Patients With Moderate to Severe Alzheimer's Disease |
| <a href="http://data.linkedct.org/resource/trials/NCT00531609">http://data.linkedct.org/resource/trials/NCT00531609</a> | Alzheimer's Disease | Safety and Tolerability of Long-Term Treatment by Rivastigmine Transdermal Patch in Patients With Probable Alzheimer's Disease                         |
| <a href="http://data.linkedct.org/resource/trials/NCT00594568">http://data.linkedct.org/resource/trials/NCT00594568</a> | Alzheimer's Disease | Effect of LY450139 on the Long Term Progression of Alzheimer's Disease                                                                                 |
| <a href="http://data.linkedct.org/resource/trials/NCT00606476">http://data.linkedct.org/resource/trials/NCT00606476</a> | Alzheimer's Disease | AAB-001 (Bapineuzumab) Open-Label, Long-Term Extension Study in Patients With Mild to Moderate Alzheimer's Disease                                     |
| <a href="http://data.linkedct.org/resource/trials/NCT00759863">http://data.linkedct.org/resource/trials/NCT00759863</a> | Alzheimer's Disease | LifeZig Personalized Reminiscence Video With Slideshows and Music for Individuals With Alzheimer's and Dementia                                        |
| <a href="http://data.linkedct.org/resource/trials/NCT00777608">http://data.linkedct.org/resource/trials/NCT00777608</a> | Alzheimer's Disease | A Study to Test the Performance of the CogState Computerized Neuropsychological Battery in Patients With Alzheimer's Disease.                          |
| <a href="http://data.linkedct.org/resource/trials/NCT00889603">http://data.linkedct.org/resource/trials/NCT00889603</a> | Alzheimer's Disease | Non-Interventional Study With Aricept® Evess                                                                                                           |

Supplement 01 (v03) to "The Translational Medicine Ontology and Knowledge Base: Driving personalized medicine by bridging the gap between bench and bedside", Joanne S. Luciano et al., JBMS, Bio-Ontologies 2010 (2011)

|                                                                                                                         |                                     |                                                                                                                                                          |
|-------------------------------------------------------------------------------------------------------------------------|-------------------------------------|----------------------------------------------------------------------------------------------------------------------------------------------------------|
| <a href="http://data.linkedct.org/resource/trials/NCT00795418">http://data.linkedct.org/resource/trials/NCT00795418</a> | Alzheimer's Disease                 | Safety and Tolerability of Repeated Subcutaneous Injections of CAD 106 in Mild Alzheimer's Patients                                                      |
| <a href="http://data.linkedct.org/resource/trials/NCT00810147">http://data.linkedct.org/resource/trials/NCT00810147</a> | Alzheimer's Disease                 | A Phase II, Multicenter, Double Blind, Placebo-Controlled Safety, Tolerability Study of BMS-708163 in Patients With Mild to Moderate Alzheimer's Disease |
| <a href="http://data.linkedct.org/resource/trials/NCT00757939">http://data.linkedct.org/resource/trials/NCT00757939</a> | Alzheimer's Disease                 | A Study to Evaluate dASL Imaging as a Biomarker for Alzheimer's Disease                                                                                  |
| <a href="http://data.linkedct.org/resource/trials/NCT00829816">http://data.linkedct.org/resource/trials/NCT00829816</a> | Alzheimer's Disease                 | Safety and Tolerability of Dimebon in Patients on Memantine, and Memantine Plus Donepezil                                                                |
| <a href="http://data.linkedct.org/resource/trials/NCT00880347">http://data.linkedct.org/resource/trials/NCT00880347</a> | Alzheimer's Disease                 | Blood Gene Expression Signature in Patients Diagnosed With Probable Alzheimer's Disease Compared to Patients Suffering From Other Types of Dementia      |
| <a href="http://data.linkedct.org/resource/trials/NCT00987090">http://data.linkedct.org/resource/trials/NCT00987090</a> | Alzheimer's Disease                 | Early-onset and Late-onset Sporadic Alzheimer's Disease (AD)                                                                                             |
| <a href="http://data.linkedct.org/resource/trials/NCT00988624">http://data.linkedct.org/resource/trials/NCT00988624</a> | Alzheimer's Disease                 | A Study In Healthy Volunteers To Estimate The Pharmacokinetics Of Four Modified-Release Formulations Of Dimebon (Latrepidine)                            |
| <a href="http://data.linkedct.org/resource/trials/NCT00670228">http://data.linkedct.org/resource/trials/NCT00670228</a> | Anterior Wall Myocardial Infarction | EFFECT of Insulin Glargine and Apidra in Patients With Acute ST Elevation MI                                                                             |
| <a href="http://data.linkedct.org/resource/trials/NCT00303147">http://data.linkedct.org/resource/trials/NCT00303147</a> | Anxiety                             | Cognitive and Health Benefits of Expressive Writing for Family Caregivers Under Stress                                                                   |
| <a href="http://data.linkedct.org/resource/trials/NCT00164203">http://data.linkedct.org/resource/trials/NCT00164203</a> | Anxiety                             | The Feelings Club: Evaluating a School-Based Intervention for Children at Risk for Depression and Anxiety Disorders                                      |
| <a href="http://data.linkedct.org/resource/trials/NCT00245817">http://data.linkedct.org/resource/trials/NCT00245817</a> | Anxiety                             | HINCAB-Study. Home Based Intervention in                                                                                                                 |

Supplement 01 (v03) to "The Translational Medicine Ontology and Knowledge Base: Driving personalized medicine by bridging the gap between bench and bedside", Joanne S. Luciano et al., JBMS, Bio-Ontologies 2010 (2011)

|                                                                                                                         |                  |                                                                                                                         |
|-------------------------------------------------------------------------------------------------------------------------|------------------|-------------------------------------------------------------------------------------------------------------------------|
|                                                                                                                         |                  | Nursing for Coronary Artery Bypass Patients                                                                             |
| <a href="http://data.linkedct.org/resource/trials/NCT00108277">http://data.linkedct.org/resource/trials/NCT00108277</a> | Anxiety          | Respiratory Dysregulation and Breathing Training in Anxious Outpatients                                                 |
| <a href="http://data.linkedct.org/resource/trials/NCT00152763">http://data.linkedct.org/resource/trials/NCT00152763</a> | Anxiety          | Psychological Support for Patients With an Implantable Cardioverter Defibrillator                                       |
| <a href="http://data.linkedct.org/resource/trials/NCT00183326">http://data.linkedct.org/resource/trials/NCT00183326</a> | Anxiety          | Treating Post Traumatic Stress Disorder in Children Exposed to Domestic Violence                                        |
| <a href="http://data.linkedct.org/resource/trials/NCT00302744">http://data.linkedct.org/resource/trials/NCT00302744</a> | Anxiety          | Effects of Psilocybin in Advanced-Stage Cancer Patients With Anxiety                                                    |
| <a href="http://data.linkedct.org/resource/trials/NCT00360451">http://data.linkedct.org/resource/trials/NCT00360451</a> | Anxiety          | Effectiveness of School-Based Cognitive Behavioral Therapy in Preventing Depression in Young Adolescents                |
| <a href="http://data.linkedct.org/resource/trials/NCT00578214">http://data.linkedct.org/resource/trials/NCT00578214</a> | Anxiety          | Safety and Efficacy of Oral Midazolam for Perioperative Anxiety Relief of Patients Undergoing Mohs Micrographic Surgery |
| <a href="http://data.linkedct.org/resource/trials/NCT00634608">http://data.linkedct.org/resource/trials/NCT00634608</a> | Anxiety          | Integrating Targeted MedlinePlus Health Prescriptions Into Clinic Practice Workflow                                     |
| <a href="http://data.linkedct.org/resource/trials/NCT00641940">http://data.linkedct.org/resource/trials/NCT00641940</a> | Anxiety          | Girls in Transition Study: Helping Girls Enter the Teenage Years                                                        |
| <a href="http://data.linkedct.org/resource/trials/NCT00841022">http://data.linkedct.org/resource/trials/NCT00841022</a> | Anxiety          | Information and Anaesthesia in Paediatrics                                                                              |
| <a href="http://data.linkedct.org/resource/trials/NCT00114127">http://data.linkedct.org/resource/trials/NCT00114127</a> | Anxiety Disorder | Duloxetine for Social Anxiety Disorder: Prediction of Long Term Outcome                                                 |
| <a href="http://data.linkedct.org/resource/trials/NCT00225459">http://data.linkedct.org/resource/trials/NCT00225459</a> | Anxiety Disorder | Does Spiritual/Religious Commitment Mediate the Relationship Between Mood Variability and Suicidal Ideation.            |
| <a href="http://data.linkedct.org/resource/trials/NCT00438685">http://data.linkedct.org/resource/trials/NCT00438685</a> | Anxiety Disorder | Outpatient Adolescent Treatment for Comorbid Substance Use and Internalizing Disorders                                  |

Supplement 01 (v03) to "The Translational Medicine Ontology and Knowledge Base: Driving personalized medicine by bridging the gap between bench and bedside", Joanne S. Luciano et al., JBMS, Bio-Ontologies 2010 (2011)

|                                                                                                                         |                    |                                                                                                                                                     |
|-------------------------------------------------------------------------------------------------------------------------|--------------------|-----------------------------------------------------------------------------------------------------------------------------------------------------|
| <a href="http://data.linkedct.org/resource/trials/NCT00483639">http://data.linkedct.org/resource/trials/NCT00483639</a> | Anxiety Disorder   | Study of Anxiety and Avoidance of Others in Patients Previously Treated for Head and Neck Cancer                                                    |
| <a href="http://data.linkedct.org/resource/trials/NCT00373022">http://data.linkedct.org/resource/trials/NCT00373022</a> | Anxiety Disorder   | Moderate Physical Activity in Helping Patients Recover Physically and Emotionally From Stage II Or Stage III Colorectal Cancer                      |
| <a href="http://data.linkedct.org/resource/trials/NCT00158327">http://data.linkedct.org/resource/trials/NCT00158327</a> | Anxiety Disorders  | Telephone-Based Care Management Program for Individuals With Anxiety Disorders                                                                      |
| <a href="http://data.linkedct.org/resource/trials/NCT00052078">http://data.linkedct.org/resource/trials/NCT00052078</a> | Anxiety Disorders  | Child and Adolescent Anxiety Disorders (CAMS)                                                                                                       |
| <a href="http://data.linkedct.org/resource/trials/NCT00248612">http://data.linkedct.org/resource/trials/NCT00248612</a> | Anxiety Disorders  | Psychosocial and Medication Treatment for Anxiety in Alcoholism                                                                                     |
| <a href="http://data.linkedct.org/resource/trials/NCT00118001">http://data.linkedct.org/resource/trials/NCT00118001</a> | Anxiety Disorders  | Psychotherapy of Generalized Anxiety Disorder                                                                                                       |
| <a href="http://data.linkedct.org/resource/trials/NCT00149760">http://data.linkedct.org/resource/trials/NCT00149760</a> | Anxiety Disorders  | Effectiveness of Cognitive-Affective Behavior Therapy for the Treatment of Somatization Disorder                                                    |
| <a href="http://data.linkedct.org/resource/trials/NCT00280670">http://data.linkedct.org/resource/trials/NCT00280670</a> | Anxiety Disorders  | CBT for Comorbid Anxiety Disorders in Children With Autism, Asperger Syndrome, or PDD-NOS                                                           |
| <a href="http://data.linkedct.org/resource/trials/NCT00557648">http://data.linkedct.org/resource/trials/NCT00557648</a> | Anxiety Disorders  | Evaluating the Effectiveness of Early Cognitive Behavioral Therapy With or Without Parental Involvement in Treating Children With Anxiety Disorders |
| <a href="http://data.linkedct.org/resource/trials/NCT00446407">http://data.linkedct.org/resource/trials/NCT00446407</a> | Anxiety Disorders  | Evaluating the Benefits and Affordability of a Program to Improve the Care of Common Mental Disorders in Primary Care                               |
| <a href="http://data.linkedct.org/resource/trials/NCT00395213">http://data.linkedct.org/resource/trials/NCT00395213</a> | Anxiety Disorders  | Antidepressant Safety in Kids Study                                                                                                                 |
| <a href="http://data.linkedct.org/resource/trials/NCT00384332">http://data.linkedct.org/resource/trials/NCT00384332</a> | Bipolar Depression | Medication, Weight Gain and GI Hormones                                                                                                             |
| <a href="http://data.linkedct.org/resource/trials/NCT00457054">http://data.linkedct.org/resource/trials/NCT00457054</a> | Bipolar Depression | Functional Connectivity in Mood Regulating Circuit In                                                                                               |

Supplement 01 (v03) to "The Translational Medicine Ontology and Knowledge Base: Driving personalized medicine by bridging the gap between bench and bedside", Joanne S. Luciano et al., JBMS, Bio-Ontologies 2010 (2011)



|                                                                                                                         |                                                            |                                                                                                                                                             |
|-------------------------------------------------------------------------------------------------------------------------|------------------------------------------------------------|-------------------------------------------------------------------------------------------------------------------------------------------------------------|
|                                                                                                                         |                                                            | Bipolar Depression and Mania                                                                                                                                |
| <a href="http://data.linkedct.org/resource/trials/NCT00544544">http://data.linkedct.org/resource/trials/NCT00544544</a> | Bipolar Depression                                         | Riluzole in the Treatment of Bipolar Depression                                                                                                             |
| <a href="http://data.linkedct.org/resource/trials/NCT00562861">http://data.linkedct.org/resource/trials/NCT00562861</a> | Bipolar Depression                                         | Treatment for Bipolar Depression: Acute & Prophylactic Efficacy With Citalopram                                                                             |
| <a href="http://data.linkedct.org/resource/trials/NCT00204503">http://data.linkedct.org/resource/trials/NCT00204503</a> | Bipolar I or II Depression and Alcohol Abuse or Dependence | Open-Label Depakote ER in Patients With Bipolar I or II Depression and Alcohol Abuse or Dependence                                                          |
| <a href="http://data.linkedct.org/resource/trials/NCT00596986">http://data.linkedct.org/resource/trials/NCT00596986</a> | Chronic Depression                                         | Getting Biased Treatment Study: How Psychotherapy and Antidepressants Change Brain Activity in Chronic Depression                                           |
| <a href="http://data.linkedct.org/resource/trials/NCT00259454">http://data.linkedct.org/resource/trials/NCT00259454</a> | Dementia, Alzheimer Type                                   | Project COPE:Managing Dementia at Home                                                                                                                      |
| <a href="http://data.linkedct.org/resource/trials/NCT00009191">http://data.linkedct.org/resource/trials/NCT00009191</a> | Depression                                                 | The Depression in Alzheimer's Disease Study (DIADS)                                                                                                         |
| <a href="http://data.linkedct.org/resource/trials/NCT00019643">http://data.linkedct.org/resource/trials/NCT00019643</a> | Depression                                                 | Factors Affecting Weight Gain in Women Receiving Adjuvant Chemotherapy for Breast Cancer                                                                    |
| <a href="http://data.linkedct.org/resource/trials/NCT00037024">http://data.linkedct.org/resource/trials/NCT00037024</a> | Depression                                                 | Study of Health Promotion in Patients With Early-Stage Breast or Prostate Cancer                                                                            |
| <a href="http://data.linkedct.org/resource/trials/NCT00043550">http://data.linkedct.org/resource/trials/NCT00043550</a> | Depression                                                 | Treatments for Depression: Drug Versus Psychotherapy                                                                                                        |
| <a href="http://data.linkedct.org/resource/trials/NCT00052091">http://data.linkedct.org/resource/trials/NCT00052091</a> | Depression                                                 | Therapy for Depressed Elders With Thought Problems                                                                                                          |
| <a href="http://data.linkedct.org/resource/trials/NCT00057551">http://data.linkedct.org/resource/trials/NCT00057551</a> | Depression                                                 | Research Evaluating the Value of Augmenting Medication With Psychotherapy (REVAMP)                                                                          |
| <a href="http://data.linkedct.org/resource/trials/NCT00061698">http://data.linkedct.org/resource/trials/NCT00061698</a> | Depression                                                 | Treatment for Depressed Preadolescent Girls                                                                                                                 |
| <a href="http://data.linkedct.org/resource/trials/NCT00068458">http://data.linkedct.org/resource/trials/NCT00068458</a> | Depression                                                 | Survival TRaining for ENhancing Total Health (STRENGTH): Distance Medicine-Based Exercise and Diet in Preventing Body Composition Change in Women Receiving |

Supplement 01 (v03) to "The Translational Medicine Ontology and Knowledge Base: Driving personalized medicine by bridging the gap between bench and bedside", Joanne S. Luciano et al., JBMS, Bio-Ontologies 2010 (2011)

|                                                                                                                         |            |                                                                                                     |
|-------------------------------------------------------------------------------------------------------------------------|------------|-----------------------------------------------------------------------------------------------------|
|                                                                                                                         |            | Chemotherapy for Stage I, Stage II, or Stage IIIA Breast Cancer                                     |
| <a href="http://data.linkedct.org/resource/trials/NCT00112515">http://data.linkedct.org/resource/trials/NCT00112515</a> | Depression | Modafinil in Treating Fatigue in Patients With Cancer                                               |
| <a href="http://data.linkedct.org/resource/trials/NCT00122031">http://data.linkedct.org/resource/trials/NCT00122031</a> | Depression | Deep Brain Stimulation for Treatment-Refractory Major Depression                                    |
| <a href="http://data.linkedct.org/resource/trials/NCT00136318">http://data.linkedct.org/resource/trials/NCT00136318</a> | Depression | S-Citalopram for the Prevention of PEGASYS-Induced Depression                                       |
| <a href="http://data.linkedct.org/resource/trials/NCT00149838">http://data.linkedct.org/resource/trials/NCT00149838</a> | Depression | Magnetic Brain Stimulation for the Treatment of Adult Depression                                    |
| <a href="http://data.linkedct.org/resource/trials/NCT00166075">http://data.linkedct.org/resource/trials/NCT00166075</a> | Depression | Mental Health Symptoms and Intimate Partner Violence                                                |
| <a href="http://data.linkedct.org/resource/trials/NCT00178880">http://data.linkedct.org/resource/trials/NCT00178880</a> | Depression | MRI Imaging of Chronobiologic Abnormalities in Depression                                           |
| <a href="http://data.linkedct.org/resource/trials/NCT00183729">http://data.linkedct.org/resource/trials/NCT00183729</a> | Depression | Memantine Treatment for Improving Rehabilitation Outcomes and Preventing Depression in Older Adults |
| <a href="http://data.linkedct.org/resource/trials/NCT00186056">http://data.linkedct.org/resource/trials/NCT00186056</a> | Depression | Mifepristone in Refractory Depression                                                               |
| <a href="http://data.linkedct.org/resource/trials/NCT00192582">http://data.linkedct.org/resource/trials/NCT00192582</a> | Depression | AIMHI NT Relapse Prevention Trial                                                                   |
| <a href="http://data.linkedct.org/resource/trials/NCT00209118">http://data.linkedct.org/resource/trials/NCT00209118</a> | Depression | Paroxetine for the Treatment of Interferon Related Side Effects for Hepatitis C                     |
| <a href="http://data.linkedct.org/resource/trials/NCT00214682">http://data.linkedct.org/resource/trials/NCT00214682</a> | Depression | Beyond Ageing Project: A Study for the Prevention of Depression                                     |
| <a href="http://data.linkedct.org/resource/trials/NCT00231959">http://data.linkedct.org/resource/trials/NCT00231959</a> | Depression | Effectiveness of Pramipexole for Treatment-Resistant Depression                                     |
| <a href="http://data.linkedct.org/resource/trials/NCT00234312">http://data.linkedct.org/resource/trials/NCT00234312</a> | Depression | Medications for the Treatment of Dysthymic Disorder and Double Depression                           |
| <a href="http://data.linkedct.org/resource/trials/NCT00242619">http://data.linkedct.org/resource/trials/NCT00242619</a> | Depression | Insulin Resistance in Patients With Mood Disorder                                                   |
| <a href="http://data.linkedct.org/resource/trials/NCT00280319">http://data.linkedct.org/resource/trials/NCT00280319</a> | Depression | Study of Treatments for Depression Among                                                            |

Supplement 01 (v03) to "The Translational Medicine Ontology and Knowledge Base: Driving personalized medicine by bridging the gap between bench and bedside", Joanne S. Luciano et al., JBMS, Bio-Ontologies 2010 (2011)

|                                                                                                                         |            |                                                                                                                                                     |
|-------------------------------------------------------------------------------------------------------------------------|------------|-----------------------------------------------------------------------------------------------------------------------------------------------------|
|                                                                                                                         |            | Displaced Adolescents in Northern Uganda.                                                                                                           |
| <a href="http://data.linkedct.org/resource/trials/NCT00298805">http://data.linkedct.org/resource/trials/NCT00298805</a> | Depression | A Quality of Life Study in Patients With Migraines                                                                                                  |
| <a href="http://data.linkedct.org/resource/trials/NCT00316303">http://data.linkedct.org/resource/trials/NCT00316303</a> | Depression | Effectiveness of the Screen, Test, Immunize, Reduce Risk, and Refer (STIRR) Intervention for People With Both a Mental and Substance Abuse Disorder |
| <a href="http://data.linkedct.org/resource/trials/NCT00026637">http://data.linkedct.org/resource/trials/NCT00026637</a> | Depression | Depression and Health Outcomes in Refractory Epilepsy                                                                                               |
| <a href="http://data.linkedct.org/resource/trials/NCT00044174">http://data.linkedct.org/resource/trials/NCT00044174</a> | Depression | Dyadic Interactions in Depressed and Non-Depressed Mothers and Their Infants                                                                        |
| <a href="http://data.linkedct.org/resource/trials/NCT00057577">http://data.linkedct.org/resource/trials/NCT00057577</a> | Depression | Preventing the Recurrence of Depression With Drugs and Psychotherapy                                                                                |
| <a href="http://data.linkedct.org/resource/trials/NCT00071162">http://data.linkedct.org/resource/trials/NCT00071162</a> | Depression | Genetics of Fibromyalgia                                                                                                                            |
| <a href="http://data.linkedct.org/resource/trials/NCT00076245">http://data.linkedct.org/resource/trials/NCT00076245</a> | Depression | Cognitive Behavioral Therapy for the Treatment of Seasonal Affective Disorder (SAD)                                                                 |
| <a href="http://data.linkedct.org/resource/trials/NCT00086138">http://data.linkedct.org/resource/trials/NCT00086138</a> | Depression | Depression in Alzheimer's Disease-2                                                                                                                 |
| <a href="http://data.linkedct.org/resource/trials/NCT00103415">http://data.linkedct.org/resource/trials/NCT00103415</a> | Depression | Trial Investigating the Effect of Different Exercise Forms on Depression                                                                            |
| <a href="http://data.linkedct.org/resource/trials/NCT00105573">http://data.linkedct.org/resource/trials/NCT00105573</a> | Depression | Interventions for Depressed Low Income Mothers and Their Infants                                                                                    |
| <a href="http://data.linkedct.org/resource/trials/NCT00116857">http://data.linkedct.org/resource/trials/NCT00116857</a> | Depression | Omega-3 Fatty Acids to Improve Depression and Reduce Cardiovascular Risk Factors                                                                    |
| <a href="http://data.linkedct.org/resource/trials/NCT00129480">http://data.linkedct.org/resource/trials/NCT00129480</a> | Depression | Improving Chronic Pain Treatment in Primary Care                                                                                                    |
| <a href="http://data.linkedct.org/resource/trials/NCT00162916">http://data.linkedct.org/resource/trials/NCT00162916</a> | Depression | Antidepressant Maintenance in Traumatic Brain Injury                                                                                                |
| <a href="http://data.linkedct.org/resource/trials/NCT00164203">http://data.linkedct.org/resource/trials/NCT00164203</a> | Depression | The Feelings Club: Evaluating a School-Based Intervention for Children at Risk for Depression and Anxiety Disorders                                 |

Supplement 01 (v03) to "The Translational Medicine Ontology and Knowledge Base: Driving personalized medicine by bridging the gap between bench and bedside", Joanne S. Luciano et al., JBMS, Bio-Ontologies 2010 (2011)

|                                                                                                                         |            |                                                                                                |
|-------------------------------------------------------------------------------------------------------------------------|------------|------------------------------------------------------------------------------------------------|
| <a href="http://data.linkedct.org/resource/trials/NCT00169286">http://data.linkedct.org/resource/trials/NCT00169286</a> | Depression | Organized Self-Management Support for Chronic Depression                                       |
| <a href="http://data.linkedct.org/resource/trials/NCT00178828">http://data.linkedct.org/resource/trials/NCT00178828</a> | Depression | Dynamic Measures of Neurochemistry in Mood Disorders                                           |
| <a href="http://data.linkedct.org/resource/trials/NCT00183417">http://data.linkedct.org/resource/trials/NCT00183417</a> | Depression | Depression Prevention Program for Adolescents                                                  |
| <a href="http://data.linkedct.org/resource/trials/NCT00183560">http://data.linkedct.org/resource/trials/NCT00183560</a> | Depression | Preventing Depression Relapse With Mindfulness-Based Cognitive Therapy                         |
| <a href="http://data.linkedct.org/resource/trials/NCT00183677">http://data.linkedct.org/resource/trials/NCT00183677</a> | Depression | Brain Energy Metabolism in Individuals With Major Depressive Disorder Receiving Escitalopram   |
| <a href="http://data.linkedct.org/resource/trials/NCT00183716">http://data.linkedct.org/resource/trials/NCT00183716</a> | Depression | The Trauma Recovery and Empowerment Model for Treating Post-Traumatic Stress Disorder in Women |
| <a href="http://data.linkedct.org/resource/trials/NCT00218764">http://data.linkedct.org/resource/trials/NCT00218764</a> | Depression | Cognitive Therapy Versus Medication Treatment for Preventing Depression Relapse                |
| <a href="http://data.linkedct.org/resource/trials/NCT00241761">http://data.linkedct.org/resource/trials/NCT00241761</a> | Depression | Epidemiology of Depression and Heart Failure in Aging                                          |
| <a href="http://data.linkedct.org/resource/trials/NCT00245817">http://data.linkedct.org/resource/trials/NCT00245817</a> | Depression | HINCAB-Study. Home Based Intervention in Nursing for Coronary Artery Bypass Patients           |
| <a href="http://data.linkedct.org/resource/trials/NCT00247624">http://data.linkedct.org/resource/trials/NCT00247624</a> | Depression | Improving Sleep and Psychological Functioning in People With Depression and Insomnia           |
| <a href="http://data.linkedct.org/resource/trials/NCT00254007">http://data.linkedct.org/resource/trials/NCT00254007</a> | Depression | Depression and Traumatic Brain Injury                                                          |
| <a href="http://data.linkedct.org/resource/trials/NCT00258752">http://data.linkedct.org/resource/trials/NCT00258752</a> | Depression | Comparison of Three Therapy-Based Interventions for Preventing Depression in Adolescents       |
| <a href="http://data.linkedct.org/resource/trials/NCT00285584">http://data.linkedct.org/resource/trials/NCT00285584</a> | Depression | Bupropion For Reducing High-Risk Behaviors in Depressed Men Who Have Sex With Men (MSM)        |
| <a href="http://data.linkedct.org/resource/trials/NCT00304915">http://data.linkedct.org/resource/trials/NCT00304915</a> | Depression | HIV Translating Initiatives for Depression Into Effective Solutions                            |
| <a href="http://data.linkedct.org/resource">http://data.linkedct.org/resource</a>                                       | Depression | Study Comparing                                                                                |

Supplement 01 (v03) to "The Translational Medicine Ontology and Knowledge Base: Driving personalized medicine by bridging the gap between bench and bedside", Joanne S. Luciano et al., JBMS, Bio-Ontologies 2010 (2011)

|                                                                                                                         |            |                                                                                                        |
|-------------------------------------------------------------------------------------------------------------------------|------------|--------------------------------------------------------------------------------------------------------|
| /trials/NCT00305565                                                                                                     |            | Outcomes for Patients With Treatment Resistant Depression Who Receive VNS Therapy at Different Doses   |
| <a href="http://data.linkedct.org/resource/trials/NCT00338962">http://data.linkedct.org/resource/trials/NCT00338962</a> | Depression | Naltrexone & SSRI in Alcoholics With Depression/PTSD                                                   |
| <a href="http://data.linkedct.org/resource/trials/NCT00027378">http://data.linkedct.org/resource/trials/NCT00027378</a> | Depression | Pharmacological Intervention Project (Fluoxetine)                                                      |
| <a href="http://data.linkedct.org/resource/trials/NCT00029172">http://data.linkedct.org/resource/trials/NCT00029172</a> | Depression | Treatment for Post-Stroke Depression                                                                   |
| <a href="http://data.linkedct.org/resource/trials/NCT00071643">http://data.linkedct.org/resource/trials/NCT00071643</a> | Depression | Preventing Post-Stroke Depression                                                                      |
| <a href="http://data.linkedct.org/resource/trials/NCT00073359">http://data.linkedct.org/resource/trials/NCT00073359</a> | Depression | Effects of Therapist Behavior on the Treatment of Depressed Adolescents                                |
| <a href="http://data.linkedct.org/resource/trials/NCT00073671">http://data.linkedct.org/resource/trials/NCT00073671</a> | Depression | Prevention of Depression in At-Risk Adolescents                                                        |
| <a href="http://data.linkedct.org/resource/trials/NCT00074789">http://data.linkedct.org/resource/trials/NCT00074789</a> | Depression | Reducing Symptoms of Depression in Low-Income Mothers                                                  |
| <a href="http://data.linkedct.org/resource/trials/NCT00076258">http://data.linkedct.org/resource/trials/NCT00076258</a> | Depression | Adding Exercise to Antidepressant Medication Treatment for Depression                                  |
| <a href="http://data.linkedct.org/resource/trials/NCT00076622">http://data.linkedct.org/resource/trials/NCT00076622</a> | Depression | Medication Treatment for Depression in Nursing Home Residents                                          |
| <a href="http://data.linkedct.org/resource/trials/NCT00091962">http://data.linkedct.org/resource/trials/NCT00091962</a> | Depression | Effectiveness of Depression Treatment Following Coronary Artery Bypass Surgery                         |
| <a href="http://data.linkedct.org/resource/trials/NCT00118404">http://data.linkedct.org/resource/trials/NCT00118404</a> | Depression | Cognitive Therapy for Recurrent Depression                                                             |
| <a href="http://data.linkedct.org/resource/trials/NCT00118430">http://data.linkedct.org/resource/trials/NCT00118430</a> | Depression | Stepped Care for Depression and Musculoskeletal Pain                                                   |
| <a href="http://data.linkedct.org/resource/trials/NCT00140257">http://data.linkedct.org/resource/trials/NCT00140257</a> | Depression | DECARD: Study of Escitalopram in the Prevention of Depression in Patients With Acute Coronary Syndrome |
| <a href="http://data.linkedct.org/resource/trials/NCT00152763">http://data.linkedct.org/resource/trials/NCT00152763</a> | Depression | Psychological Support for Patients With an Implantable Cardioverter Defibrillator                      |
| <a href="http://data.linkedct.org/resource/trials/NCT00159965">http://data.linkedct.org/resource/trials/NCT00159965</a> | Depression | Treatments for Psychogenic Nonepileptic                                                                |

Supplement 01 (v03) to "The Translational Medicine Ontology and Knowledge Base: Driving personalized medicine by bridging the gap between bench and bedside", Joanne S. Luciano et al., JBMS, Bio-Ontologies 2010 (2011)

|                                                                                                                         |            |                                                                                                                                         |
|-------------------------------------------------------------------------------------------------------------------------|------------|-----------------------------------------------------------------------------------------------------------------------------------------|
|                                                                                                                         |            | Seizures (NES)                                                                                                                          |
| <a href="http://data.linkedct.org/resource/trials/NCT00177294">http://data.linkedct.org/resource/trials/NCT00177294</a> | Depression | Augmenting Antidepressant Treatment With Interpersonal Psychotherapy for Treating Late-Life Depression                                  |
| <a href="http://data.linkedct.org/resource/trials/NCT00177671">http://data.linkedct.org/resource/trials/NCT00177671</a> | Depression | Antidepressant Medication Plus Donepezil for Treating Late-Life Depression                                                              |
| <a href="http://data.linkedct.org/resource/trials/NCT00178906">http://data.linkedct.org/resource/trials/NCT00178906</a> | Depression | Acoustical Properties of Speech as Indicators of Suicidal Risk                                                                          |
| <a href="http://data.linkedct.org/resource/trials/NCT00181961">http://data.linkedct.org/resource/trials/NCT00181961</a> | Depression | Safety and Effectiveness Study of Maca Root to Treat Antidepressant-Induced Sexual Dysfunction                                          |
| <a href="http://data.linkedct.org/resource/trials/NCT00182078">http://data.linkedct.org/resource/trials/NCT00182078</a> | Depression | A Study of Sertraline to Prevent PTSD                                                                                                   |
| <a href="http://data.linkedct.org/resource/trials/NCT00183326">http://data.linkedct.org/resource/trials/NCT00183326</a> | Depression | Treating Post Traumatic Stress Disorder in Children Exposed to Domestic Violence                                                        |
| <a href="http://data.linkedct.org/resource/trials/NCT00206362">http://data.linkedct.org/resource/trials/NCT00206362</a> | Depression | Ability to Cope With Type 1 Diabetes                                                                                                    |
| <a href="http://data.linkedct.org/resource/trials/NCT00223652">http://data.linkedct.org/resource/trials/NCT00223652</a> | Depression | Telephone Administered Psychotherapy for the Treatment of Depression for Veterans in Rural Areas                                        |
| <a href="http://data.linkedct.org/resource/trials/NCT00226642">http://data.linkedct.org/resource/trials/NCT00226642</a> | Depression | Treatment of Mild and Subthreshold Depressive Disorders                                                                                 |
| <a href="http://data.linkedct.org/resource/trials/NCT00241774">http://data.linkedct.org/resource/trials/NCT00241774</a> | Depression | Coronary Heart Disease Incidence: Depression & Inflammation Risk                                                                        |
| <a href="http://data.linkedct.org/resource/trials/NCT00279370">http://data.linkedct.org/resource/trials/NCT00279370</a> | Depression | Antidepressant Use During Pregnancy                                                                                                     |
| <a href="http://data.linkedct.org/resource/trials/NCT00285818">http://data.linkedct.org/resource/trials/NCT00285818</a> | Depression | Mifepristone Used to Treat Patients With Non-Psychotic Major Depressive Disorder Referred for Bilateral Electroconvulsive Therapy (ECT) |
| <a href="http://data.linkedct.org/resource/trials/NCT00316290">http://data.linkedct.org/resource/trials/NCT00316290</a> | Depression | Integrated Parent Training for Treating Depression in Mothers of Children With Attention Deficit Hyperactivity Disorder                 |

Supplement 01 (v03) to "The Translational Medicine Ontology and Knowledge Base: Driving personalized medicine by bridging the gap between bench and bedside", Joanne S. Luciano et al., JBMS, Bio-Ontologies 2010 (2011)

|                                                                                                                         |            |                                                                                                                                                          |
|-------------------------------------------------------------------------------------------------------------------------|------------|----------------------------------------------------------------------------------------------------------------------------------------------------------|
| <a href="http://data.linkedct.org/resource/trials/NCT00344474">http://data.linkedct.org/resource/trials/NCT00344474</a> | Depression | Personality-Targeted Interventions for Adolescent Alcohol Misuse                                                                                         |
| <a href="http://data.linkedct.org/resource/trials/NCT00360451">http://data.linkedct.org/resource/trials/NCT00360451</a> | Depression | Effectiveness of School-Based Cognitive Behavioral Therapy in Preventing Depression in Young Adolescents                                                 |
| <a href="http://data.linkedct.org/resource/trials/NCT00381823">http://data.linkedct.org/resource/trials/NCT00381823</a> | Depression | Healthy Outcomes of Pregnancy Education                                                                                                                  |
| <a href="http://data.linkedct.org/resource/trials/NCT00430404">http://data.linkedct.org/resource/trials/NCT00430404</a> | Depression | Screening and Treatment of Depression in the Community                                                                                                   |
| <a href="http://data.linkedct.org/resource/trials/NCT00468676">http://data.linkedct.org/resource/trials/NCT00468676</a> | Depression | Nurse-Led Case Management for Diabetes and Cardiovascular Disease Patients With Depression                                                               |
| <a href="http://data.linkedct.org/resource/trials/NCT00582595">http://data.linkedct.org/resource/trials/NCT00582595</a> | Depression | LABS-3 Psychosocial                                                                                                                                      |
| <a href="http://data.linkedct.org/resource/trials/NCT00601393">http://data.linkedct.org/resource/trials/NCT00601393</a> | Depression | Effectiveness of Internet-Based Cognitive Behavioral Therapy for Treating Mothers With Depression                                                        |
| <a href="http://data.linkedct.org/resource/trials/NCT00619619">http://data.linkedct.org/resource/trials/NCT00619619</a> | Depression | Study Evaluating Desvenlafaxine Succinate Sustained-Release (DVS SR) in the Treatment of Child and Adolescent Outpatients With Major Depressive Disorder |
| <a href="http://data.linkedct.org/resource/trials/NCT00624013">http://data.linkedct.org/resource/trials/NCT00624013</a> | Depression | Diabetes and Depression in Hispanics and African Americans: Treatment of Depression With Sertraline and Its Effect on A1c and Quality of Life            |
| <a href="http://data.linkedct.org/resource/trials/NCT00664885">http://data.linkedct.org/resource/trials/NCT00664885</a> | Depression | Effectiveness of Cultural Sensitive Collaborative Treatment of Depressed Chinese                                                                         |
| <a href="http://data.linkedct.org/resource/trials/NCT00672880">http://data.linkedct.org/resource/trials/NCT00672880</a> | Depression | Self System Therapy and Chronic Low Back Pain Trial                                                                                                      |
| <a href="http://data.linkedct.org/resource/trials/NCT00676962">http://data.linkedct.org/resource/trials/NCT00676962</a> | Depression | Facilitating Implementation of Cognitive Behavioral Therapy in Primary Care and Community Clinics                                                        |

Supplement 01 (v03) to "The Translational Medicine Ontology and Knowledge Base: Driving personalized medicine by bridging the gap between bench and bedside", Joanne S. Luciano et al., JBMS, Bio-Ontologies 2010 (2011)

|                                                                                                                         |            |                                                                                                                                                       |
|-------------------------------------------------------------------------------------------------------------------------|------------|-------------------------------------------------------------------------------------------------------------------------------------------------------|
| <a href="http://data.linkedct.org/resource/trials/NCT00373022">http://data.linkedct.org/resource/trials/NCT00373022</a> | Depression | Moderate Physical Activity in Helping Patients Recover Physically and Emotionally From Stage II Or Stage III Colorectal Cancer                        |
| <a href="http://data.linkedct.org/resource/trials/NCT00416221">http://data.linkedct.org/resource/trials/NCT00416221</a> | Depression | PACEPro - Mood Management Pilot                                                                                                                       |
| <a href="http://data.linkedct.org/resource/trials/NCT00436150">http://data.linkedct.org/resource/trials/NCT00436150</a> | Depression | Interpersonal Therapy-Based Treatment to Prevent Postpartum Depression in Adolescent Mothers                                                          |
| <a href="http://data.linkedct.org/resource/trials/NCT00446407">http://data.linkedct.org/resource/trials/NCT00446407</a> | Depression | Evaluating the Benefits and Affordability of a Program to Improve the Care of Common Mental Disorders in Primary Care                                 |
| <a href="http://data.linkedct.org/resource/trials/NCT00449007">http://data.linkedct.org/resource/trials/NCT00449007</a> | Depression | Fluoxetine and Bupropion to Treat Patients With Depression and Alcoholism                                                                             |
| <a href="http://data.linkedct.org/resource/trials/NCT00459329">http://data.linkedct.org/resource/trials/NCT00459329</a> | Depression | PEARL Intervention to Reduce Depression Among Adults With Epilepsy                                                                                    |
| <a href="http://data.linkedct.org/resource/trials/NCT00495768">http://data.linkedct.org/resource/trials/NCT00495768</a> | Depression | Reducing Depressive Symptoms During HCV Therapy: A Randomized Study                                                                                   |
| <a href="http://data.linkedct.org/resource/trials/NCT00499759">http://data.linkedct.org/resource/trials/NCT00499759</a> | Depression | Individualized Exercise Programs for Patients Receiving Chemotherapy for Newly Diagnosed Acute or Relapsed Myeloid Leukemia or Lymphoblastic Leukemia |
| <a href="http://data.linkedct.org/resource/trials/NCT00611975">http://data.linkedct.org/resource/trials/NCT00611975</a> | Depression | Effect of Antidepressants on Sex Hormone Levels and Sexual Functioning                                                                                |
| <a href="http://data.linkedct.org/resource/trials/NCT00456430">http://data.linkedct.org/resource/trials/NCT00456430</a> | Depression | Serotonin Transporter Genetic Variation and Amygdalar Activation Correlates of Antidepressant Response                                                |
| <a href="http://data.linkedct.org/resource/trials/NCT00499785">http://data.linkedct.org/resource/trials/NCT00499785</a> | Depression | Physical and Mental Assessment of Older Patients With Newly Diagnosed Acute Myeloid Leukemia                                                          |

Supplement 01 (v03) to "The Translational Medicine Ontology and Knowledge Base: Driving personalized medicine by bridging the gap between bench and bedside", Joanne S. Luciano et al., JBMS, Bio-Ontologies 2010 (2011)



|                                                                                                                         |            |                                                                                                                               |
|-------------------------------------------------------------------------------------------------------------------------|------------|-------------------------------------------------------------------------------------------------------------------------------|
| <a href="http://data.linkedct.org/resource/trials/NCT00573547">http://data.linkedct.org/resource/trials/NCT00573547</a> | Depression | Open Label Trial of Fluoxetine for the Treatment of Depression in Patients With End Stage Renal Disease                       |
| <a href="http://data.linkedct.org/resource/trials/NCT00574145">http://data.linkedct.org/resource/trials/NCT00574145</a> | Depression | Healing Touch in Treating Fatigue in Women Undergoing Radiation Therapy for Breast Cancer                                     |
| <a href="http://data.linkedct.org/resource/trials/NCT00578318">http://data.linkedct.org/resource/trials/NCT00578318</a> | Depression | African American Knowledge Optimized for Mindfully Healthy Adolescents                                                        |
| <a href="http://data.linkedct.org/resource/trials/NCT00594711">http://data.linkedct.org/resource/trials/NCT00594711</a> | Depression | Monoamine Transporter Function and Autonomic Regulation During Psychodynamic Psychotherapy                                    |
| <a href="http://data.linkedct.org/resource/trials/NCT00634608">http://data.linkedct.org/resource/trials/NCT00634608</a> | Depression | Integrating Targeted MedlinePlus Health Prescriptions Into Clinic Practice Workflow                                           |
| <a href="http://data.linkedct.org/resource/trials/NCT00640562">http://data.linkedct.org/resource/trials/NCT00640562</a> | Depression | Quetiapine Extended Release Depression Symptoms                                                                               |
| <a href="http://data.linkedct.org/resource/trials/NCT00641940">http://data.linkedct.org/resource/trials/NCT00641940</a> | Depression | Girls in Transition Study: Helping Girls Enter the Teenage Years                                                              |
| <a href="http://data.linkedct.org/resource/trials/NCT00669110">http://data.linkedct.org/resource/trials/NCT00669110</a> | Depression | Study Evaluating DVS SR in the Treatment of Child and Adolescent Outpatients With Major Depressive Disorder                   |
| <a href="http://data.linkedct.org/resource/trials/NCT00694681">http://data.linkedct.org/resource/trials/NCT00694681</a> | Depression | Working Toward Wellness                                                                                                       |
| <a href="http://data.linkedct.org/resource/trials/NCT00709150">http://data.linkedct.org/resource/trials/NCT00709150</a> | Depression | Effectiveness of Collaborative Depression Care Management in Treating Depressed Low-Income Hispanics With Diabetes            |
| <a href="http://data.linkedct.org/resource/trials/NCT00770068">http://data.linkedct.org/resource/trials/NCT00770068</a> | Depression | Examining the Link Between Depression and Seasonal Allergies                                                                  |
| <a href="http://data.linkedct.org/resource/trials/NCT00776685">http://data.linkedct.org/resource/trials/NCT00776685</a> | Depression | Adventure: The Efficacy of Personality-Targeted Interventions for Substance Misuse and Other Risky Behaviours as Delivered by |

Supplement 01 (v03) to "The Translational Medicine Ontology and Knowledge Base: Driving personalized medicine by bridging the gap between bench and bedside", Joanne S. Luciano et al., JBMS, Bio-Ontologies 2010 (2011)

|                                                                                                                         |                              |                                                                                                                                                                           |
|-------------------------------------------------------------------------------------------------------------------------|------------------------------|---------------------------------------------------------------------------------------------------------------------------------------------------------------------------|
|                                                                                                                         |                              | Educational Professionals                                                                                                                                                 |
| <a href="http://data.linkedct.org/resource/trials/NCT00785603">http://data.linkedct.org/resource/trials/NCT00785603</a> | Depression                   | Paroxetine Effect on Tramadol Metabolism and Pharmacokinetics: a Dose Response Study                                                                                      |
| <a href="http://data.linkedct.org/resource/trials/NCT00906581">http://data.linkedct.org/resource/trials/NCT00906581</a> | Depression                   | Self-Guided Depression Treatment on Long-Duration Spaceflights: A Continuation Study                                                                                      |
| <a href="http://data.linkedct.org/resource/trials/NCT00788814">http://data.linkedct.org/resource/trials/NCT00788814</a> | Depression                   | Study of Pathways Curriculum for Use With WPD                                                                                                                             |
| <a href="http://data.linkedct.org/resource/trials/NCT00845455">http://data.linkedct.org/resource/trials/NCT00845455</a> | Depression                   | Personality Type as a Predictor to Develop Depression and Reduction in Quality of Life Among Stroke Survivors.                                                            |
| <a href="http://data.linkedct.org/resource/trials/NCT00863291">http://data.linkedct.org/resource/trials/NCT00863291</a> | Depression                   | A Double-Blind Study of Buprenorphine Treatment of Acute Suicidality                                                                                                      |
| <a href="http://data.linkedct.org/resource/trials/NCT00186186">http://data.linkedct.org/resource/trials/NCT00186186</a> | Depression, Bipolar          | Depakote ER in Bipolar Depression                                                                                                                                         |
| <a href="http://data.linkedct.org/resource/trials/NCT00490971">http://data.linkedct.org/resource/trials/NCT00490971</a> | Depression, Bipolar          | A Study to Evaluate the Effectiveness and Safety of Extended-Release (ER) Paliperidone Compared With Placebo in Delaying the Recurrence of Symptoms in Bipolar I Disorder |
| <a href="http://data.linkedct.org/resource/trials/NCT00510146">http://data.linkedct.org/resource/trials/NCT00510146</a> | Depression, Bipolar          | Olanzapine Treatment of Patients With Bipolar I Disorder                                                                                                                  |
| <a href="http://data.linkedct.org/resource/trials/NCT00051246">http://data.linkedct.org/resource/trials/NCT00051246</a> | Depression, Postpartum       | Group Therapy for Postpartum Depression                                                                                                                                   |
| <a href="http://data.linkedct.org/resource/trials/NCT00219349">http://data.linkedct.org/resource/trials/NCT00219349</a> | Generalized Anxiety Disorder | Cognitive-Behavioral Therapy and Lexapro for GAD                                                                                                                          |
| <a href="http://data.linkedct.org/resource/trials/NCT00347269">http://data.linkedct.org/resource/trials/NCT00347269</a> | Generalized Anxiety Disorder | Primary Care Intervention Strategy for Anxiety Disorders                                                                                                                  |
| <a href="http://data.linkedct.org/resource/trials/NCT00052078">http://data.linkedct.org/resource/trials/NCT00052078</a> | Generalized Anxiety Disorder | Child and Adolescent Anxiety Disorders (CAMS)                                                                                                                             |
| <a href="http://data.linkedct.org/resource/trials/NCT00120458">http://data.linkedct.org/resource/trials/NCT00120458</a> | Generalized Anxiety Disorder | Black Cohosh as Alternative Therapy for Treating Menopause-Related Anxiety                                                                                                |
| <a href="http://data.linkedct.org/resource/trials/NCT00308724">http://data.linkedct.org/resource/trials/NCT00308724</a> | Generalized Anxiety Disorder | Treating Late-Life Generalized Anxiety                                                                                                                                    |

Supplement 01 (v03) to "The Translational Medicine Ontology and Knowledge Base: Driving personalized medicine by bridging the gap between bench and bedside", Joanne S. Luciano et al., JBMS, Bio-Ontologies 2010 (2011)

|                                                                                                                         |                              |                                                                                                                       |
|-------------------------------------------------------------------------------------------------------------------------|------------------------------|-----------------------------------------------------------------------------------------------------------------------|
|                                                                                                                         |                              | Disorder (GAD) in Primary Care                                                                                        |
| <a href="http://data.linkedct.org/resource/trials/NCT00620776">http://data.linkedct.org/resource/trials/NCT00620776</a> | Generalized Anxiety Disorder | Combined Treatment for Generalized Anxiety Disorder (GAD)                                                             |
| <a href="http://data.linkedct.org/resource/trials/NCT00569829">http://data.linkedct.org/resource/trials/NCT00569829</a> | Generalized Anxiety Disorder | Modular Cognitive Behavioral Therapy for the Treatment of Child Anxiety Disorders in Elementary School Settings       |
| <a href="http://data.linkedct.org/resource/trials/NCT00515242">http://data.linkedct.org/resource/trials/NCT00515242</a> | Generalized Anxiety Disorder | Therapeutic Massage for Generalized Anxiety Disorder                                                                  |
| <a href="http://data.linkedct.org/resource/trials/NCT00788034">http://data.linkedct.org/resource/trials/NCT00788034</a> | Generalized Anxiety Disorder | Relapse-prevention Study With Lu AA21004 in Patients With Generalized Anxiety Disorder                                |
| <a href="http://data.linkedct.org/resource/trials/NCT00803361">http://data.linkedct.org/resource/trials/NCT00803361</a> | Generalized Anxiety Disorder | Duloxetine for the Treatment of Generalized Anxiety Disorder                                                          |
| <a href="http://data.linkedct.org/resource/trials/NCT00902564">http://data.linkedct.org/resource/trials/NCT00902564</a> | Generalized Anxiety Disorder | Efficacy and Safety of Escitalopram in Patients With Generalized Anxiety Disorder                                     |
| <a href="http://data.linkedct.org/resource/trials/NCT00174577">http://data.linkedct.org/resource/trials/NCT00174577</a> | Major Depression             | Risperidone Augmentation Therapy in Patients Who Have Failed or Only Partially Responded to a Trial of Antidepressant |
| <a href="http://data.linkedct.org/resource/trials/NCT00291239">http://data.linkedct.org/resource/trials/NCT00291239</a> | Major Depression             | Effect of Partial Sleep Deprivation on Cognition and Cytokines in Individuals With Major Depression                   |
| <a href="http://data.linkedct.org/resource/trials/NCT00616759">http://data.linkedct.org/resource/trials/NCT00616759</a> | Major Depression             | The Effect on Cognition of Terminating ECT Induced Seizures With Propofol                                             |
| <a href="http://data.linkedct.org/resource/trials/NCT00461279">http://data.linkedct.org/resource/trials/NCT00461279</a> | Major Depression             | Attachment Security as Mediator and Moderator of Outcome in Major Depression                                          |
| <a href="http://data.linkedct.org/resource/trials/NCT00532480">http://data.linkedct.org/resource/trials/NCT00532480</a> | Major Depression             | Study of Brain Response to Emotional Pictures Using a fMRI While on Duloxetine                                        |
| <a href="http://data.linkedct.org/resource/trials/NCT00627029">http://data.linkedct.org/resource/trials/NCT00627029</a> | Major Depression             | Evaluation of Programs of Coordinated Care and Disease Management                                                     |
| <a href="http://data.linkedct.org/resource/trials/NCT00472576">http://data.linkedct.org/resource/trials/NCT00472576</a> | Major Depression             | Antidepressant Effects of NR2B in Major Depression                                                                    |

Supplement 01 (v03) to "The Translational Medicine Ontology and Knowledge Base: Driving personalized medicine by bridging the gap between bench and bedside", Joanne S. Luciano et al., JBMS, Bio-Ontologies 2010 (2011)

|                                                                                                                         |                                    |                                                                                                                                                             |
|-------------------------------------------------------------------------------------------------------------------------|------------------------------------|-------------------------------------------------------------------------------------------------------------------------------------------------------------|
| <a href="http://data.linkedct.org/resource/trials/NCT00541957">http://data.linkedct.org/resource/trials/NCT00541957</a> | Major Depression                   | Randomized Trial of Psychotherapy for Persistently Depressed Primary Care Patients                                                                          |
| <a href="http://data.linkedct.org/resource/trials/NCT00565110">http://data.linkedct.org/resource/trials/NCT00565110</a> | Major Depression                   | Treating Depression Among Low-Income Patients With Cancer                                                                                                   |
| <a href="http://data.linkedct.org/resource/trials/NCT00918684">http://data.linkedct.org/resource/trials/NCT00918684</a> | Major Depression                   | Aging Brain Changes, Executive Dysfunction and Depression                                                                                                   |
| <a href="http://data.linkedct.org/resource/trials/NCT00243451">http://data.linkedct.org/resource/trials/NCT00243451</a> | Mild Alzheimer's Disease           | Early Detection of Mild Cognitive Impairment in Individual Patients                                                                                         |
| <a href="http://data.linkedct.org/resource/trials/NCT00595582">http://data.linkedct.org/resource/trials/NCT00595582</a> | Mild Alzheimer's Disease           | Early Intervention in Mild Cognitive Impairment (MCI) With Curcumin + Bioperine                                                                             |
| <a href="http://data.linkedct.org/resource/trials/NCT00571064">http://data.linkedct.org/resource/trials/NCT00571064</a> | Mild to Severe Alzheimer's Disease | The Effectiveness And Safety Of Donepezil Hydrochloride (E2020) In Subjects With Mild To Severe Alzheimer's Disease Residing In An Assisted Living Facility |
| <a href="http://data.linkedct.org/resource/trials/NCT00692432">http://data.linkedct.org/resource/trials/NCT00692432</a> | Myocardial Depression              | Macrophage Inhibitory Factor (MIF) and High-Mobility Group-1 Protein (HMG-1) in Children Undergoing Cardiopulmonary Bypass                                  |
| <a href="http://data.linkedct.org/resource/trials/NCT00025766">http://data.linkedct.org/resource/trials/NCT00025766</a> | Myocardial Infarction              | Angioplasty and Heart Stents to Treat Individuals With an Occluded Artery Following a Heart Attack                                                          |
| <a href="http://data.linkedct.org/resource/trials/NCT00066898">http://data.linkedct.org/resource/trials/NCT00066898</a> | Myocardial Infarction              | ARISE – Aggressive Reduction of Inflammation Stops Events                                                                                                   |
| <a href="http://data.linkedct.org/resource/trials/NCT00075088">http://data.linkedct.org/resource/trials/NCT00075088</a> | Myocardial Infarction              | Tele-Electrocardiography in Emergency Cardiac Care                                                                                                          |
| <a href="http://data.linkedct.org/resource/trials/NCT00114452">http://data.linkedct.org/resource/trials/NCT00114452</a> | Myocardial Infarction              | Safety Study of Adult Mesenchymal Stem Cells (MSC) to Treat Acute Myocardial Infarction                                                                     |
| <a href="http://data.linkedct.org/resource/trials/NCT00119847">http://data.linkedct.org/resource/trials/NCT00119847</a> | Myocardial Infarction              | Balloon Catheters and Stents to Prevent Heart Rhythm Irregularities in Individuals Post-Heart Attack                                                        |

Supplement 01 (v03) to "The Translational Medicine Ontology and Knowledge Base: Driving personalized medicine by bridging the gap between bench and bedside", Joanne S. Luciano et al., JBMS, Bio-Ontologies 2010 (2011)

|                                                                                                                         |                       |                                                                                                             |
|-------------------------------------------------------------------------------------------------------------------------|-----------------------|-------------------------------------------------------------------------------------------------------------|
| <a href="http://data.linkedct.org/resource/trials/NCT00126750">http://data.linkedct.org/resource/trials/NCT00126750</a> | Myocardial Infarction | Web-Enhanced Guideline Implementation for Post MI CBOC Patients                                             |
| <a href="http://data.linkedct.org/resource/trials/NCT00164190">http://data.linkedct.org/resource/trials/NCT00164190</a> | Myocardial Infarction | Routine Angioplasty and Stenting After Fibrinolysis for Acute Myocardial Infarction                         |
| <a href="http://data.linkedct.org/resource/trials/NCT00195169">http://data.linkedct.org/resource/trials/NCT00195169</a> | Myocardial Infarction | Quality of Life After Myocardial Infarction                                                                 |
| <a href="http://data.linkedct.org/resource/trials/NCT00253097">http://data.linkedct.org/resource/trials/NCT00253097</a> | Myocardial Infarction | The Post Stroke Preventive Trial (PREVENT). A RCT Nested in a Cohort Study                                  |
| <a href="http://data.linkedct.org/resource/trials/NCT00269425">http://data.linkedct.org/resource/trials/NCT00269425</a> | Myocardial Infarction | The Heart Institute of Spokane Diet Study                                                                   |
| <a href="http://data.linkedct.org/resource/trials/NCT00303979">http://data.linkedct.org/resource/trials/NCT00303979</a> | Myocardial Infarction | IMPROVE HF: Registry to Improve the Use of Evidence-Based Heart Failure Therapies in the Outpatient Setting |
| <a href="http://data.linkedct.org/resource/trials/NCT00004562">http://data.linkedct.org/resource/trials/NCT00004562</a> | Myocardial Infarction | Occluded Artery Trial (OAT)                                                                                 |
| <a href="http://data.linkedct.org/resource/trials/NCT00013741">http://data.linkedct.org/resource/trials/NCT00013741</a> | Myocardial Infarction | The MI-HEART Project                                                                                        |
| <a href="http://data.linkedct.org/resource/trials/NCT00066053">http://data.linkedct.org/resource/trials/NCT00066053</a> | Myocardial Infarction | Periodontitis and Cardiovascular Events or "PAVE"                                                           |
| <a href="http://data.linkedct.org/resource/trials/NCT00099411">http://data.linkedct.org/resource/trials/NCT00099411</a> | Myocardial Infarction | Heart Muscle Viability and Remodeling in Individuals Post-Heart Attack                                      |
| <a href="http://data.linkedct.org/resource/trials/NCT00116857">http://data.linkedct.org/resource/trials/NCT00116857</a> | Myocardial Infarction | Omega-3 Fatty Acids to Improve Depression and Reduce Cardiovascular Risk Factors                            |
| <a href="http://data.linkedct.org/resource/trials/NCT00139464">http://data.linkedct.org/resource/trials/NCT00139464</a> | Myocardial Infarction | Alpha Omega Trial                                                                                           |
| <a href="http://data.linkedct.org/resource/trials/NCT00149591">http://data.linkedct.org/resource/trials/NCT00149591</a> | Myocardial Infarction | The Viability-Guided Angioplasty After Acute Myocardial Infarction-Trial (The VIAMI-Trial)                  |
| <a href="http://data.linkedct.org/resource/trials/NCT00175058">http://data.linkedct.org/resource/trials/NCT00175058</a> | Myocardial Infarction | Acute Myocardial Infarction With HyperOxemic Therapy II (AMIHOT II)                                         |
| <a href="http://data.linkedct.org/resource/trials/NCT00279175">http://data.linkedct.org/resource/trials/NCT00279175</a> | Myocardial Infarction | REPAIR-AMI: Intracoronary Progenitor Cells in Acute Myocardial Infarction (AMI)                             |
| <a href="http://data.linkedct.org/resource/trials/NCT00005487">http://data.linkedct.org/resource/trials/NCT00005487</a> | Myocardial Infarction | Multi-Ethnic Study of Atherosclerosis (MESA)                                                                |
| <a href="http://data.linkedct.org/resource">http://data.linkedct.org/resource</a>                                       | Myocardial Infarction | Look AHEAD: Action for                                                                                      |

Supplement 01 (v03) to "The Translational Medicine Ontology and Knowledge Base: Driving personalized medicine by bridging the gap between bench and bedside", Joanne S. Luciano et al., JBMS, Bio-Ontologies 2010 (2011)

|                                                                                                                         |                       |                                                                                                                       |
|-------------------------------------------------------------------------------------------------------------------------|-----------------------|-----------------------------------------------------------------------------------------------------------------------|
| /trials/NCT00017953                                                                                                     |                       | Health in Diabetes                                                                                                    |
| <a href="http://data.linkedct.org/resource/trials/NCT00054678">http://data.linkedct.org/resource/trials/NCT00054678</a> | Myocardial Infarction | MYOHEART™ (Myogenesis Heart Efficiency and Regeneration Trial)                                                        |
| <a href="http://data.linkedct.org/resource/trials/NCT00071032">http://data.linkedct.org/resource/trials/NCT00071032</a> | Myocardial Infarction | Safety and Effectiveness of Two Blood Transfusion Strategies in Surgical Patients With Cardiovascular Disease         |
| <a href="http://data.linkedct.org/resource/trials/NCT00093197">http://data.linkedct.org/resource/trials/NCT00093197</a> | Myocardial Infarction | Safety of KAI-9803 for Injection With Angioplasty Following Heart Attack                                              |
| <a href="http://data.linkedct.org/resource/trials/NCT00106886">http://data.linkedct.org/resource/trials/NCT00106886</a> | Myocardial Infarction | HOPE-2 Study (Heart Outcomes Prevention Evaluation-2 Study)                                                           |
| <a href="http://data.linkedct.org/resource/trials/NCT00128024">http://data.linkedct.org/resource/trials/NCT00128024</a> | Myocardial Infarction | Effects of Early Statin Treatment After Acute Myocardial Infarction (AMI) in Japanese Patients                        |
| <a href="http://data.linkedct.org/resource/trials/NCT00136929">http://data.linkedct.org/resource/trials/NCT00136929</a> | Myocardial Infarction | Senior PAMI: Primary Angioplasty Versus Thrombolytic Therapy for Acute Myocardial Infarction in the Elderly           |
| <a href="http://data.linkedct.org/resource/trials/NCT00229515">http://data.linkedct.org/resource/trials/NCT00229515</a> | Myocardial Infarction | Multicentre 2x2 Factorial Randomised Study Comparing Tirofiban Versus Abciximab and SES Versus BMS in AMI             |
| <a href="http://data.linkedct.org/resource/trials/NCT00235339">http://data.linkedct.org/resource/trials/NCT00235339</a> | Myocardial Infarction | Effect of Standard Care Rehabilitation Versus Interval Treadmill Training After Myocardial Infarction                 |
| <a href="http://data.linkedct.org/resource/trials/NCT00288210">http://data.linkedct.org/resource/trials/NCT00288210</a> | Myocardial Infarction | Sirolimus Eluting Stenting in Acute Myocardial Infarction                                                             |
| <a href="http://data.linkedct.org/resource/trials/NCT00336830">http://data.linkedct.org/resource/trials/NCT00336830</a> | Myocardial Infarction | Improving Cardiac Rehabilitation Participation in Women and Men                                                       |
| <a href="http://data.linkedct.org/resource/trials/NCT00375817">http://data.linkedct.org/resource/trials/NCT00375817</a> | Myocardial Infarction | Safety and Effects of Implanted (Autologous) Skeletal Myoblasts (MyoCell) Using an Injection Catheter = SEISMIC Trial |
| <a href="http://data.linkedct.org/resource/trials/NCT00395811">http://data.linkedct.org/resource/trials/NCT00395811</a> | Myocardial Infarction | Stem Cell Therapy to Improve Myocardial Function in Patients                                                          |

Supplement 01 (v03) to "The Translational Medicine Ontology and Knowledge Base: Driving personalized medicine by bridging the gap between bench and bedside", Joanne S. Luciano et al., JBMS, Bio-Ontologies 2010 (2011)

|                                                                                                                         |                       |                                                                                                                                                        |
|-------------------------------------------------------------------------------------------------------------------------|-----------------------|--------------------------------------------------------------------------------------------------------------------------------------------------------|
|                                                                                                                         |                       | Undergoing Coronary Artery Bypass Grafting (CABG)                                                                                                      |
| <a href="http://data.linkedct.org/resource/trials/NCT00426231">http://data.linkedct.org/resource/trials/NCT00426231</a> | Myocardial Infarction | Culturally-Tailored Approach to Improve Medication Use in Patients With Heart Attacks                                                                  |
| <a href="http://data.linkedct.org/resource/trials/NCT00617123">http://data.linkedct.org/resource/trials/NCT00617123</a> | Myocardial Infarction | Trial to Assess the Ocular Safety of SCH 530348 in Patients With Atherosclerosis (Study P05183AM1)                                                     |
| <a href="http://data.linkedct.org/resource/trials/NCT00638638">http://data.linkedct.org/resource/trials/NCT00638638</a> | Myocardial Infarction | Myocardial Infarction With ST-Elevation                                                                                                                |
| <a href="http://data.linkedct.org/resource/trials/NCT00389545">http://data.linkedct.org/resource/trials/NCT00389545</a> | Myocardial Infarction | Intracoronary Stem Cells in Large Myocardial Infarction                                                                                                |
| <a href="http://data.linkedct.org/resource/trials/NCT00403728">http://data.linkedct.org/resource/trials/NCT00403728</a> | Myocardial Infarction | Ciclosporin A and Acute Myocardial Infarction                                                                                                          |
| <a href="http://data.linkedct.org/resource/trials/NCT00430820">http://data.linkedct.org/resource/trials/NCT00430820</a> | Myocardial Infarction | Discovery of New Circulating Biomarkers of Coronary Atherosclerosis                                                                                    |
| <a href="http://data.linkedct.org/resource/trials/NCT00489827">http://data.linkedct.org/resource/trials/NCT00489827</a> | Myocardial Infarction | Glutamate for Metabolic Intervention in Coronary Surgery                                                                                               |
| <a href="http://data.linkedct.org/resource/trials/NCT00590291">http://data.linkedct.org/resource/trials/NCT00590291</a> | Myocardial Infarction | Molecular Determinants of Coronary Artery Disease                                                                                                      |
| <a href="http://data.linkedct.org/resource/trials/NCT00692991">http://data.linkedct.org/resource/trials/NCT00692991</a> | Myocardial Infarction | Using Magnetic Resonance Imaging to Evaluate Heart Vessel Function After Angioplasty or Stent Placement Procedures                                     |
| <a href="http://data.linkedct.org/resource/trials/NCT00433966">http://data.linkedct.org/resource/trials/NCT00433966</a> | Myocardial Infarction | Harmonizing Outcomes With Revascularization and Stents in Acute Myocardial Infarction                                                                  |
| <a href="http://data.linkedct.org/resource/trials/NCT00442806">http://data.linkedct.org/resource/trials/NCT00442806</a> | Myocardial Infarction | Randomized Clinical Trial of Adipose-Derived Stem Cells in the Treatment of Pts With ST-Elevation Myocardial Infarction                                |
| <a href="http://data.linkedct.org/resource/trials/NCT00526474">http://data.linkedct.org/resource/trials/NCT00526474</a> | Myocardial Infarction | Trial to Assess the Effects of SCH 530348 in Preventing Heart Attack and Stroke in Patients With Atherosclerosis (TRA 2°P - TIMI 50) (Study P04737AM2) |
| <a href="http://data.linkedct.org/resource">http://data.linkedct.org/resource</a>                                       | Myocardial Infarction | Study of Myocardial                                                                                                                                    |

Supplement 01 (v03) to "The Translational Medicine Ontology and Knowledge Base: Driving personalized medicine by bridging the gap between bench and bedside", Joanne S. Luciano et al., JBMS, Bio-Ontologies 2010 (2011)

|                                                                                                                         |                                                          |                                                                                                                                                                             |
|-------------------------------------------------------------------------------------------------------------------------|----------------------------------------------------------|-----------------------------------------------------------------------------------------------------------------------------------------------------------------------------|
| /trials/NCT00575289                                                                                                     |                                                          | Perfusion and Coronary Anatomy Imaging Roles in Coronary Artery Disease                                                                                                     |
| <a href="http://data.linkedct.org/resource/trials/NCT00626145">http://data.linkedct.org/resource/trials/NCT00626145</a> | Myocardial Infarction                                    | Long Term Follow-up of Autologous Bone Marrow Mononuclear Cells Therapy in STEMI                                                                                            |
| <a href="http://data.linkedct.org/resource/trials/NCT00671346">http://data.linkedct.org/resource/trials/NCT00671346</a> | Myocardial Infarction                                    | NORVIT and WENBIT - Long-term Follow-up                                                                                                                                     |
| <a href="http://data.linkedct.org/resource/trials/NCT00691470">http://data.linkedct.org/resource/trials/NCT00691470</a> | Myocardial Infarction                                    | Comparison of ATI-5923, a Novel Vitamin K Antagonist, With Warfarin in Patients Requiring Chronic Anticoagulation                                                           |
| <a href="http://data.linkedct.org/resource/trials/NCT00872456">http://data.linkedct.org/resource/trials/NCT00872456</a> | Myocardial Infarction                                    | Study to Assess the Incidence of Cardiovascular Disease (CVD) Complications in Diabetic Patients Pre-Stratified by Haptoglobin Phenotype and HbA1c From the I CARE Registry |
| <a href="http://data.linkedct.org/resource/trials/NCT00926133">http://data.linkedct.org/resource/trials/NCT00926133</a> | Myocardial Infarction                                    | Type 2 Diabetes and Acute Myocardial Infarction                                                                                                                             |
| <a href="http://data.linkedct.org/resource/trials/NCT00936169">http://data.linkedct.org/resource/trials/NCT00936169</a> | Myocardial Infarction                                    | Angiography Versus (vs) IVUS Optimisation                                                                                                                                   |
| <a href="http://data.linkedct.org/resource/trials/NCT00863967">http://data.linkedct.org/resource/trials/NCT00863967</a> | Myocardial Infarction                                    | Early Detection of Arteriosclerosis                                                                                                                                         |
| <a href="http://data.linkedct.org/resource/trials/NCT00846222">http://data.linkedct.org/resource/trials/NCT00846222</a> | Myocardial Infarction Complicated With Cardiogenic Shock | Adjunctive Mild Hypothermia Therapy to Primary Percutaneous Coronary Intervention in Patients With Acute Myocardial Infarction Complicated With Shock: A Feasibility Study  |
| <a href="http://data.linkedct.org/resource/trials/NCT00842946">http://data.linkedct.org/resource/trials/NCT00842946</a> | Nongeneralized Social Anxiety Disorder                   | Exposure With Acceptance-Based Versus Habituation-Based Rationale for Public Speaking Anxiety                                                                               |
| <a href="http://data.linkedct.org/resource/trials/NCT00605631">http://data.linkedct.org/resource/trials/NCT00605631</a> | Post Myocardial Infarction                               | The Prevention of Myocardial Enlargement and Dilatation Post Myocardial Infarction Study                                                                                    |
| <a href="http://data.linkedct.org/resource/trials/NCT00360204">http://data.linkedct.org/resource/trials/NCT00360204</a> | Postpartum Depression                                    | Improving Health Outcomes for New Mothers and Babies                                                                                                                        |
| <a href="http://data.linkedct.org/resource">http://data.linkedct.org/resource</a>                                       | Postpartum Depression                                    | Mom: Managing Our Mood,                                                                                                                                                     |

Supplement 01 (v03) to "The Translational Medicine Ontology and Knowledge Base: Driving personalized medicine by bridging the gap between bench and bedside", Joanne S. Luciano et al., JBMS, Bio-Ontologies 2010 (2011)



|                                                                                                                         |                                    |                                                                                                                 |
|-------------------------------------------------------------------------------------------------------------------------|------------------------------------|-----------------------------------------------------------------------------------------------------------------|
| /trials/NCT00795652                                                                                                     |                                    | Part of The Family Help Program                                                                                 |
| <a href="http://data.linkedct.org/resource/trials/NCT00556140">http://data.linkedct.org/resource/trials/NCT00556140</a> | Psychotic Depression               | The Combination of Aripiprazole and Antidepressants in Psychotic Major Depression                               |
| <a href="http://data.linkedct.org/resource/trials/NCT00842946">http://data.linkedct.org/resource/trials/NCT00842946</a> | Public Speaking Anxiety            | Exposure With Acceptance-Based Versus Habituation-Based Rationale for Public Speaking Anxiety                   |
| <a href="http://data.linkedct.org/resource/trials/NCT00875134">http://data.linkedct.org/resource/trials/NCT00875134</a> | Respiratory Depression             | Testing of the Apnea Prevention Device                                                                          |
| <a href="http://data.linkedct.org/resource/trials/NCT00502528">http://data.linkedct.org/resource/trials/NCT00502528</a> | ST-Elevation Myocardial Infarction | Endothelin Receptor Blockade in Acute ST-elevation Myocardial Infarction                                        |
| <a href="http://data.linkedct.org/resource/trials/NCT00763828">http://data.linkedct.org/resource/trials/NCT00763828</a> | ST-Elevation Myocardial Infarction | Can Hypothermia be Incorporated Into Primary Angioplasty for Heart Attack?                                      |
| <a href="http://data.linkedct.org/resource/trials/NCT00507156">http://data.linkedct.org/resource/trials/NCT00507156</a> | ST-Segment Myocardial Infarction   | Postconditioning in the Treatment of Acute ST-Segment Elevation Myocardial Infarction                           |
| <a href="http://data.linkedct.org/resource/trials/NCT00569829">http://data.linkedct.org/resource/trials/NCT00569829</a> | Separation Anxiety Disorder        | Modular Cognitive Behavioral Therapy for the Treatment of Child Anxiety Disorders in Elementary School Settings |
| <a href="http://data.linkedct.org/resource/trials/NCT00347269">http://data.linkedct.org/resource/trials/NCT00347269</a> | Social Anxiety Disorder            | Primary Care Intervention Strategy for Anxiety Disorders                                                        |
| <a href="http://data.linkedct.org/resource/trials/NCT00902226">http://data.linkedct.org/resource/trials/NCT00902226</a> | Social Anxiety Disorder            | Safety of Escitalopram in Patients With Social Anxiety Disorder                                                 |
| <a href="http://data.linkedct.org/resource/trials/NCT00565617">http://data.linkedct.org/resource/trials/NCT00565617</a> | Treatment Resistant Depression     | Epidural Cortical Stimulation for Depression                                                                    |
| <a href="http://data.linkedct.org/resource/trials/NCT00322777">http://data.linkedct.org/resource/trials/NCT00322777</a> | Unipolar Depression                | Spirituality and Depression Study                                                                               |

-----

Q8. Do I have suitable patients for an AD trial where they are looking for females who are aged over 55 years, have the APOE variant, and low ADAS COG scores?

SPARQL

Supplement 01 (v03) to "The Translational Medicine Ontology and Knowledge Base: Driving personalized medicine by bridging the gap between bench and bedside", Joanne S. Luciano et al., JBMS, Bio-Ontologies 2010 (2011)

PREFIX indivo: <http://indivo.org/vocab/xml/documents#>  
 PREFIX trans: <tag:eric@w3.org:2009/tmo/translator#>  
 PREFIX foaf: <http://xmlns.com/foaf/0.1/>

```
SELECT DISTINCT(?patient_name) ?dob ?gender
WHERE {
  GRAPH <pchr> {
    ?patient foaf:name ?patient_name .
    ?patient trans:demographics ?demographics .
    # female
    ?demographics indivo:gender ?gender .
    FILTER ( ?gender = "Female" ) .
    # age > 55 ; would have been born in 1954
    ?demographics indivo:dateOfBirth ?dob .
    FILTER ( ?dob < "1954-01-01" )
    # apoe variant
    [] trans:patient ?patient ;
      trans:test [ trans:result [ trans:variant_Synonyms ?synonyms ] ] .
    FILTER regex(?synonyms, "APOE4") .
    # low ADAS COG score: Alzheimer's Disease Assessment Scale-cognitive subscale
    # trans:testName "Alzheimer's Disease Assessment Scale-cognitive subscale" ;
    #[] trans:patient ?patient ;
    # trans:test [ trans:CPT "97532" ; trans:result [ ?p ?stuff ] ] .
  }
}
```

## Results

| patient_name     | dob        | gender |
|------------------|------------|--------|
| Marianne Huber   | 1940-01-01 | Female |
| Monica Mary Mall | 1937-05-15 | Female |

-----  
 Q9. What genes are associated with or implicated in AD?

## SPARQL

PREFIX diseasome: <http://www4.wiwiss.fu-berlin.de/diseasome/resource/diseasome/>  
 PREFIX pharmgkb: <http://bio2rdf.org/pharmgkb:>

```
SELECT DISTINCT(?gene_name)
WHERE {
  {
    GRAPH <diseasome> {
      ?disease rdfs:label ?disease_name .
      FILTER regex(?disease_name, "alzheimer", "i") .
      ?disease diseasome:associatedGene ?gene .
      ?gene rdfs:label ?gene_name .
    }
  }
}
```

Supplement 01 (v03) to "The Translational Medicine Ontology and Knowledge Base: Driving personalized medicine by bridging the gap between bench and bedside", Joanne S. Luciano et al., JBMS, Bio-Ontologies 2010 (2011)

```

} UNION {
  GRAPH <pharmgkb> {
    ?association rdf:type pharmgkb:Association .
    ?association pharmgkb:disease ?disease .
    ?disease rdfs:label ?disease_name .
    FILTER regex(?disease_name, "alzheimer", "i") .
    ?association pharmgkb:gene ?gene .
    ?gene dc:identifier ?gene_name .
  }
}
ORDER BY ASC(?gene_name)

```

## Results

| gene_name |
|-----------|
| A2M       |
| AAA       |
| ABCB4     |
| ACE       |
| ACE1      |
| AD1       |
| AD2       |
| AD3       |
| AD4       |
| ADAM12    |
| APBB2     |
| APOE      |
| APP       |
| ATP8A1    |
| BCHE      |
| BLMH      |
| BMH       |
| C1QB      |
| C1orf49   |
| CALHM1    |
| CBS       |
| CD86      |
| CHAT      |
| CHRNA7    |
| CLSTN2    |
| CRP       |
| CSF1      |
| CST3      |
| CTSD      |
| CVAP      |
| CYP2C18   |
| CYP2C19   |

Supplement 01 (v03) to "The Translational Medicine Ontology and Knowledge Base: Driving personalized medicine by bridging the gap between bench and bedside", Joanne S. Luciano et al., JBMS, Bio-Ontologies 2010 (2011)

|         |
|---------|
| CYP2C8  |
| CYP2C9  |
| DCP1    |
| DISC1   |
| DNMBP   |
| FE65L1  |
| GBP2    |
| GSTM1   |
| GSTT1   |
| HTR1A   |
| HTR7    |
| IDE     |
| KCNMA1  |
| KCTD12  |
| KIF20B  |
| LILRA3  |
| MAPT    |
| MEOX2   |
| MME     |
| MPO     |
| NAT2    |
| NCSTN   |
| NMNAT3  |
| NOS2    |
| NOS3    |
| OPCML   |
| PACIP1  |
| PAXIP1  |
| PAXIP1L |
| PCDH11X |
| PLAU    |
| PPP1R11 |
| PSEN1   |
| PSEN2   |
| PTIP    |
| RALGPS2 |
| RGSL1   |
| SIRT1   |
| SORL1   |
| SST     |
| STM2    |
| TF      |
| UBQLN1  |
| URK     |
| VEGFA   |
| WWC1    |
| ZNF224  |

Supplement 01 (v03) to "The Translational Medicine Ontology and Knowledge Base: Driving personalized medicine by bridging the gap between bench and bedside", Joanne S. Luciano et al., JBMS, Bio-Ontologies 2010 (2011)

-----

Q10. What biomarkers are associated with or implicated in AD?

SPARQL

PREFIX pharmgkb: <http://bio2rdf.org/pharmgkb:>

```
SELECT DISTINCT(?variant) ?gene_name ?description
WHERE {
  GRAPH <pharmgkb> {
    ?association a pharmgkb:DrugGeneVariantInteraction .
    ?association pharmgkb:description ?description .
    ?association pharmgkb:disease ?disease .
    ?association pharmgkb:variant ?variant .
    ?disease rdfs:label ?disease_name .
    FILTER regex(?disease_name, "alzheimer", "i") .
    ?association pharmgkb:gene ?gene .
    ?gene dc:identifier ?gene_name .
  }
}
```

ORDER BY ASC(?gene\_name)

Results

| variant                                                                               | gene_name | description                                                                                                                                                                                                                                                                                    |
|---------------------------------------------------------------------------------------|-----------|------------------------------------------------------------------------------------------------------------------------------------------------------------------------------------------------------------------------------------------------------------------------------------------------|
| <a href="http://bio2rdf.org/dbsnp:rs4343">http://bio2rdf.org/dbsnp:rs4343</a>         | ACE       | In an inbred Israeli Arab community, rs4343 was shown to be significantly associated with risk of developing Alzheimer Disease, especially when analyzed in a combined haplotype with rs4351.                                                                                                  |
| <a href="http://bio2rdf.org/dbsnp:rs4351">http://bio2rdf.org/dbsnp:rs4351</a>         | ACE       | In an inbred Israeli Arab population, rs4351 was shown to be significantly associated with risk of developing Alzheimer Disease, especially when analyzed in a combined haplotype with rs4343.                                                                                                 |
| <a href="http://bio2rdf.org/dbsnp:rs11244841">http://bio2rdf.org/dbsnp:rs11244841</a> | ADAM12    | This variant is nominally associated with late-onset Alzheimer disease (LOAD) in 2 GWAS studies.                                                                                                                                                                                               |
| <a href="http://bio2rdf.org/dbsnp:rs2066853">http://bio2rdf.org/dbsnp:rs2066853</a>   | AHR       | Conflicting studies have researched this variant in relationship to Alzheimer's, bladder cancer and lung cancer.                                                                                                                                                                               |
| <a href="http://bio2rdf.org/dbsnp:rs4420638">http://bio2rdf.org/dbsnp:rs4420638</a>   | APOC1     | GWAS results: A high-density whole-genome association study reveals that APOE is the major susceptibility gene for sporadic late-onset Alzheimer's disease. (Initial Sample Size: 664 cases, 422 controls; Replication Sample Size: NR); (Region: 19q13.32; Reported Gene(s): APOE); (p-value= |

Supplement 01 (v03) to "The Translational Medicine Ontology and Knowledge Base: Driving personalized medicine by bridging the gap between bench and bedside", Joanne S. Luciano et al., JBMS, Bio-Ontologies 2010 (2011)

|                                                                                       |        |                                                                                                                                                                                                                                                                                                                                                                                        |
|---------------------------------------------------------------------------------------|--------|----------------------------------------------------------------------------------------------------------------------------------------------------------------------------------------------------------------------------------------------------------------------------------------------------------------------------------------------------------------------------------------|
|                                                                                       |        | 9.999999999999999E-40). This variant is associated with Late onset Alzheimer's disease.                                                                                                                                                                                                                                                                                                |
| <a href="http://bio2rdf.org/dbsnp:rs4420638">http://bio2rdf.org/dbsnp:rs4420638</a>   | APOC1  | GWAS results: Candidate single-nucleotide polymorphisms from a genomewide association study of Alzheimer disease. (Initial Sample Size: 753 cases, 736 controls; Replication Sample Size: 418 cases, 249 controls); (Region: 19q13.32; Reported Gene(s): APOE, APOC; Risk Allele: rs4420638-?); (p-value= 1.999999999999999E-44). This variant is associated with Alzheimer's disease. |
| <a href="http://bio2rdf.org/dbsnp:rs4420638">http://bio2rdf.org/dbsnp:rs4420638</a>   | APOC1  | GWAS results: Sor11 as an Alzheimer's disease predisposition gene?. (Initial Sample Size: 664 cases, 422 controls; Replication Sample Size: NR); (Region: 19q13.32; Reported Gene(s): APOE; Risk Allele: rs4420638-?); (p-value= 9.999999999999999E-40). This variant is associated with Alzheimer's disease.                                                                          |
| <a href="http://bio2rdf.org/dbsnp:rs4420638">http://bio2rdf.org/dbsnp:rs4420638</a>   | APOC1  | In a GWAS of Alzheimer Disease families of self-reported European ancestry, this SNP was found to be associated with Alzheimer Disease.                                                                                                                                                                                                                                                |
| <a href="http://bio2rdf.org/dbsnp:rs12639920">http://bio2rdf.org/dbsnp:rs12639920</a> | ATP8A1 | This variant is significantly associated with late-onset Alzheimer disease (LOAD) in a GWAS study with 492 LOAD cases and 498 cognitive controls using Illumina's HumanHap550 beadchip.                                                                                                                                                                                                |
| <a href="http://bio2rdf.org/dbsnp:rs179943">http://bio2rdf.org/dbsnp:rs179943</a>     | ATXN1  | In a GWAS of Alzheimer Disease families of self-reported European ancestry, this SNP was found to be associated with Alzheimer Disease. This association did not reach significance in replication attempts with three other family samples.                                                                                                                                           |
| <a href="http://bio2rdf.org/dbsnp:rs2986017">http://bio2rdf.org/dbsnp:rs2986017</a>   | CALHM1 | This variant increases amyloid-beta levels by interfering with CALHM1-mediated Ca(2+) permeability. The SNP is significantly associated with Alzheimer's disease in independent case-control studies of 3404 participants.                                                                                                                                                             |
| <a href="http://bio2rdf.org/dbsnp:rs2986017">http://bio2rdf.org/dbsnp:rs2986017</a>   | CALHM2 | This variant increases amyloid-beta levels by interfering with CALHM1-mediated Ca(2+) permeability. The SNP is significantly associated with Alzheimer's disease in independent case-control studies of 3404 participants.                                                                                                                                                             |
| <a href="http://bio2rdf.org/dbsnp:rs4420638">http://bio2rdf.org/dbsnp:rs4420638</a>   | CD33   | GWAS results: Genome-wide Association                                                                                                                                                                                                                                                                                                                                                  |

Supplement 01 (v03) to "The Translational Medicine Ontology and Knowledge Base: Driving personalized medicine by bridging the gap between bench and bedside", Joanne S. Luciano et al., JBMS, Bio-Ontologies 2010 (2011)

|                                                                                       |         |                                                                                                                                                                                                                                                                                                                                                                                                      |
|---------------------------------------------------------------------------------------|---------|------------------------------------------------------------------------------------------------------------------------------------------------------------------------------------------------------------------------------------------------------------------------------------------------------------------------------------------------------------------------------------------------------|
| p:rs3826656                                                                           |         | Analysis Reveals Putative Alzheimer's Disease Susceptibility Loci in Addition to APOE. (Initial Sample Size: 941 affected individuals, 404 unaffected individuals; Replication Sample Size: 1,767 affected individuals, 838 unaffected individuals); (Region: 19q13.33; Reported Gene(s): CD33; Risk Allele: rs3826656-?); (p-value= 0.000006). This variant is associated with Alzheimer's disease. |
| <a href="http://bio2rdf.org/dbsnp:rs3826656">http://bio2rdf.org/dbsnp:rs3826656</a>   | CD33    | In a GWAS of Alzheimer Disease families of self-reported European ancestry, this SNP was found to be associated with Alzheimer Disease. This association was also significant in replication attempts with three other family samples.                                                                                                                                                               |
| <a href="http://bio2rdf.org/dbsnp:rs2681411">http://bio2rdf.org/dbsnp:rs2681411</a>   | CD86    | This variant is significantly associated with late-onset Alzheimer disease (LOAD) in a GWAS study with 492 LOAD cases and 498 cognitive controls using Illumina's HumanHap550 beadchip.                                                                                                                                                                                                              |
| <a href="http://bio2rdf.org/dbsnp:rs7537752">http://bio2rdf.org/dbsnp:rs7537752</a>   | CSF1    | This variant is nominally associated with late-onset Alzheimer disease (LOAD) in 2 GWAS studies.                                                                                                                                                                                                                                                                                                     |
| <a href="http://bio2rdf.org/dbsnp:rs2180566">http://bio2rdf.org/dbsnp:rs2180566</a>   | DEFB123 | This variant is significantly associated with late-onset Alzheimer disease (LOAD) in a GWAS study with 492 LOAD cases and 498 cognitive controls using Illumina's HumanHap550 beadchip.                                                                                                                                                                                                              |
| <a href="http://bio2rdf.org/dbsnp:rs12044355">http://bio2rdf.org/dbsnp:rs12044355</a> | DISC1   | GWAS results: Genome-wide association study implicates a chromosome 12 risk locus for late-onset Alzheimer disease. (Initial Sample Size: 492 cases, 496 controls; Replication Sample Size: 238 cases, 220 controls); (Region: 1q42.2; Reported Gene(s): DISC1; Risk Allele: rs12044355-?); (p-value= 0.000009). This variant is associated with Alzheimer's disease.                                |
| <a href="http://bio2rdf.org/dbsnp:rs12044355">http://bio2rdf.org/dbsnp:rs12044355</a> | DISC1   | This variant is significantly associated with late-onset Alzheimer disease (LOAD) in a GWAS study with 492 LOAD cases and 498 cognitive controls using Illumina's HumanHap550 beadchip.                                                                                                                                                                                                              |
| <a href="http://bio2rdf.org/dbsnp:rs3740057">http://bio2rdf.org/dbsnp:rs3740057</a>   | DNMBP   | This variant is associated with Alzheimer dementia in the Belgian population                                                                                                                                                                                                                                                                                                                         |
| <a href="http://bio2rdf.org/dbsnp:rs10883421">http://bio2rdf.org/dbsnp:rs10883421</a> | DNMBP   | This variant is associated with Alzheimer dementia in the Belgian population                                                                                                                                                                                                                                                                                                                         |
| <a href="http://bio2rdf.org/dbsnp:rs2373115">http://bio2rdf.org/dbsnp:rs2373115</a>   | GAB2    | GWAS Results: GAB2 alleles modify Alzheimer's risk in APOE epsilon4 carriers                                                                                                                                                                                                                                                                                                                         |

Supplement 01 (v03) to "The Translational Medicine Ontology and Knowledge Base: Driving personalized medicine by bridging the gap between bench and bedside", Joanne S. Luciano et al., JBMS, Bio-Ontologies 2010 (2011)

|                                                                                       |         |                                                                                                                                                                                                                                                                                                                                                                            |
|---------------------------------------------------------------------------------------|---------|----------------------------------------------------------------------------------------------------------------------------------------------------------------------------------------------------------------------------------------------------------------------------------------------------------------------------------------------------------------------------|
|                                                                                       |         | (Initial Sample Size: 446 cases, 290 controls; Replication Sample Size: 415 cases, 260 controls; Risk Allele: rs2373115-G).                                                                                                                                                                                                                                                |
| <a href="http://bio2rdf.org/dbsnp:rs6428503">http://bio2rdf.org/dbsnp:rs6428503</a>   | GBP2    | This variant is nominally associated with late-onset Alzheimer disease (LOAD) in 2 GWAS studies.                                                                                                                                                                                                                                                                           |
| <a href="http://bio2rdf.org/dbsnp:rs10922573">http://bio2rdf.org/dbsnp:rs10922573</a> | GBP2    | This variant is nominally associated with late-onset Alzheimer disease (LOAD) in 2 GWAS studies.                                                                                                                                                                                                                                                                           |
| <a href="http://bio2rdf.org/dbsnp:rs6942930">http://bio2rdf.org/dbsnp:rs6942930</a>   | INTS1   | This variant is significantly associated with late-onset Alzheimer disease (LOAD) in a GWAS study with 492 LOAD cases and 498 cognitive controls using Illumina's HumanHap550 beadchip.                                                                                                                                                                                    |
| <a href="http://bio2rdf.org/dbsnp:rs16934131">http://bio2rdf.org/dbsnp:rs16934131</a> | KCNMA1  | This variant is nominally associated with late-onset Alzheimer disease (LOAD) in 2 GWAS studies.                                                                                                                                                                                                                                                                           |
| <a href="http://bio2rdf.org/dbsnp:rs659628">http://bio2rdf.org/dbsnp:rs659628</a>     | KCTD12  | This variant is significantly associated with late-onset Alzheimer disease (LOAD) in a GWAS study with 492 LOAD cases and 498 cognitive controls using Illumina's HumanHap550 beadchip.                                                                                                                                                                                    |
| <a href="http://bio2rdf.org/dbsnp:rs11754661">http://bio2rdf.org/dbsnp:rs11754661</a> | MTHFD1L | This variant is significantly associated with late-onset Alzheimer disease (LOAD) in a GWAS study with 492 LOAD cases and 498 cognitive controls using Illumina's HumanHap550 beadchip.                                                                                                                                                                                    |
| <a href="http://bio2rdf.org/dbsnp:rs11653716">http://bio2rdf.org/dbsnp:rs11653716</a> | NOS2    | This variant is nominally associated with late-onset Alzheimer disease (LOAD) in 2 GWAS studies.                                                                                                                                                                                                                                                                           |
| <a href="http://bio2rdf.org/dbsnp:rs2573905">http://bio2rdf.org/dbsnp:rs2573905</a>   | PCDH11X | GWAS results: Genetic variation in PCDH11X is associated with susceptibility to late-onset Alzheimer's disease. (Initial Sample Size: 844 cases, 1,255 controls; Replication Sample Size: 1,547 cases, 1,209 controls); (Region: Xq21.31; Reported Gene(s): PCDH11X; Risk Allele: rs2573905-?); (p-value= 0.0000002). This variant is associated with Alzheimer's disease. |
| <a href="http://bio2rdf.org/dbsnp:rs3807031">http://bio2rdf.org/dbsnp:rs3807031</a>   | PPP1R11 | This variant is significantly associated with late-onset Alzheimer disease (LOAD) in a GWAS study with 492 LOAD cases and 498 cognitive controls using Illumina's HumanHap550 beadchip.                                                                                                                                                                                    |
| <a href="http://bio2rdf.org/dbsnp:rs6859">http://bio2rdf.org/dbsnp:rs6859</a>         | PVRL2   | GWAS results: A genome-wide association study for late-onset Alzheimer's disease using DNA pooling. (Initial Sample Size: 1,082 cases, 1,239 controls; Replication Sample Size: 1,400 additional controls); (Region:                                                                                                                                                       |



|                                                                                       |        |                                                                                                                                                                                                                                                                   |
|---------------------------------------------------------------------------------------|--------|-------------------------------------------------------------------------------------------------------------------------------------------------------------------------------------------------------------------------------------------------------------------|
|                                                                                       |        | 19q13.32; Reported Gene(s): PVRL2, TOMM40, APOE; Risk Allele: rs6859-A); (p-value= 5.999999999999999E-14). This variant is associated with Alzheimer's disease.                                                                                                   |
| <a href="http://bio2rdf.org/dbsnp:rs3846421">http://bio2rdf.org/dbsnp:rs3846421</a>   | SORCS2 | This variant is nominally associated with late-onset Alzheimer disease (LOAD) in 2 GWAS studies.                                                                                                                                                                  |
| <a href="http://bio2rdf.org/dbsnp:rs10786828">http://bio2rdf.org/dbsnp:rs10786828</a> | SORCS3 | This variant is nominally associated with late-onset Alzheimer disease (LOAD) in 2 GWAS studies.                                                                                                                                                                  |
| <a href="http://bio2rdf.org/dbsnp:rs7894737">http://bio2rdf.org/dbsnp:rs7894737</a>   | SORCS3 | This variant is nominally associated with late-onset Alzheimer disease (LOAD) in 2 GWAS studies.                                                                                                                                                                  |
| <a href="http://bio2rdf.org/dbsnp:rs720099">http://bio2rdf.org/dbsnp:rs720099</a>     | SORL1  | This variant is nominally associated with late-onset Alzheimer disease (LOAD) in 2 GWAS studies.                                                                                                                                                                  |
| <a href="http://bio2rdf.org/dbsnp:rs7946599">http://bio2rdf.org/dbsnp:rs7946599</a>   | SORL1  | This variant is nominally associated with late-onset Alzheimer disease (LOAD) in 2 GWAS studies.                                                                                                                                                                  |
| <a href="http://bio2rdf.org/dbsnp:rs1784919">http://bio2rdf.org/dbsnp:rs1784919</a>   | SORL1  | This variant is nominally associated with late-onset Alzheimer disease (LOAD) in 2 GWAS studies.                                                                                                                                                                  |
| <a href="http://bio2rdf.org/dbsnp:rs3781835">http://bio2rdf.org/dbsnp:rs3781835</a>   | SORL1  | This variant is nominally associated with late-onset Alzheimer disease (LOAD) in 2 GWAS studies.                                                                                                                                                                  |
| <a href="http://bio2rdf.org/dbsnp:rs3781838">http://bio2rdf.org/dbsnp:rs3781838</a>   | SORL1  | This variant is nominally associated with late-onset Alzheimer disease (LOAD) in 2 GWAS studies.                                                                                                                                                                  |
| <a href="http://bio2rdf.org/dbsnp:rs6589885">http://bio2rdf.org/dbsnp:rs6589885</a>   | SORL1  | This variant is nominally associated with late-onset Alzheimer disease (LOAD) in 2 GWAS studies.                                                                                                                                                                  |
| <a href="http://bio2rdf.org/dbsnp:rs2298814">http://bio2rdf.org/dbsnp:rs2298814</a>   | SORL1  | This variant is nominally associated with late-onset Alzheimer disease (LOAD) in 2 GWAS studies.                                                                                                                                                                  |
| <a href="http://bio2rdf.org/dbsnp:rs1792124">http://bio2rdf.org/dbsnp:rs1792124</a>   | SORL1  | This variant is nominally associated with late-onset Alzheimer disease (LOAD) in 2 GWAS studies.                                                                                                                                                                  |
| <a href="http://bio2rdf.org/dbsnp:rs11218343">http://bio2rdf.org/dbsnp:rs11218343</a> | SORL1  | This variant is nominally associated with late-onset Alzheimer disease (LOAD) in 2 GWAS studies.                                                                                                                                                                  |
| <a href="http://bio2rdf.org/dbsnp:rs11218342">http://bio2rdf.org/dbsnp:rs11218342</a> | SORL1  | This variant is nominally associated with late-onset Alzheimer disease (LOAD) in 2 GWAS studies.                                                                                                                                                                  |
| <a href="http://bio2rdf.org/dbsnp:rs157580">http://bio2rdf.org/dbsnp:rs157580</a>     | TOMM40 | GWAS results: Examination of the current top candidate genes for AD in a genome-wide association study. (Initial Sample Size: 491 cases, 479 controls; Replication Sample Size: NR); (Region: 19q13.32; Reported Gene(s): TOMM40, APOE; Risk Allele: rs157580-?); |

Supplement 01 (v03) to "The Translational Medicine Ontology and Knowledge Base: Driving personalized medicine by bridging the gap between bench and bedside", Joanne S. Luciano et al., JBMS, Bio-Ontologies 2010 (2011)

|                                                                                       |        |                                                                                                                                                                                                                                                                                                                                                                        |
|---------------------------------------------------------------------------------------|--------|------------------------------------------------------------------------------------------------------------------------------------------------------------------------------------------------------------------------------------------------------------------------------------------------------------------------------------------------------------------------|
|                                                                                       |        | (p-value= 1E-40).This variant is associated with Alzheimer's disease.                                                                                                                                                                                                                                                                                                  |
| <a href="http://bio2rdf.org/dbsnp:rs929156">http://bio2rdf.org/dbsnp:rs929156</a>     | TRIM15 | This variant is significantly associated with late-onset Alzheimer disease (LOAD) in a GWAS study with 492 LOAD cases and 498 cognitive controls using Illumina's HumanHap550 beadchip.                                                                                                                                                                                |
| <a href="http://bio2rdf.org/dbsnp:rs12514426">http://bio2rdf.org/dbsnp:rs12514426</a> | WWC1   | This variant is nominally associated with late-onset Alzheimer disease (LOAD) in 2 GWAS studies.                                                                                                                                                                                                                                                                       |
| <a href="http://bio2rdf.org/dbsnp:rs2061333">http://bio2rdf.org/dbsnp:rs2061333</a>   | ZNF224 | GWAS results: Genome-wide association study implicates a chromosome 12 risk locus for late-onset Alzheimer disease. (Initial Sample Size: 492 cases, 496 controls; Replication Sample Size: 238 cases, 220 controls); (Region: 19q13.31; Reported Gene(s): ZNF224; Risk Allele: rs2061333-?); (p-value= 0.000002).This variant is associated with Alzheimer's disease. |
| <a href="http://bio2rdf.org/dbsnp:rs4459653">http://bio2rdf.org/dbsnp:rs4459653</a>   | ZNF224 | This variant is significantly associated with late-onset Alzheimer disease (LOAD) in a GWAS study with 492 LOAD cases and 498 cognitive controls using Illumina's HumanHap550 beadchip.                                                                                                                                                                                |
| <a href="http://bio2rdf.org/dbsnp:rs2061333">http://bio2rdf.org/dbsnp:rs2061333</a>   | ZNF224 | This variant is significantly associated with late-onset Alzheimer disease (LOAD) in a GWAS study with 492 LOAD cases and 498 cognitive controls using Illumina's HumanHap550 beadchip.                                                                                                                                                                                |
| <a href="http://bio2rdf.org/dbsnp:rs2061332">http://bio2rdf.org/dbsnp:rs2061332</a>   | ZNF224 | This variant is significantly associated with late-onset Alzheimer disease (LOAD) in a GWAS study with 492 LOAD cases and 498 cognitive controls using Illumina's HumanHap550 beadchip.                                                                                                                                                                                |
| <a href="http://bio2rdf.org/dbsnp:rs4802207">http://bio2rdf.org/dbsnp:rs4802207</a>   | ZNF224 | This variant is significantly associated with late-onset Alzheimer disease (LOAD) in a GWAS study with 492 LOAD cases and 498 cognitive controls using Illumina's HumanHap550 beadchip.                                                                                                                                                                                |
| <a href="http://bio2rdf.org/dbsnp:rs3746319">http://bio2rdf.org/dbsnp:rs3746319</a>   | ZNF224 | This variant is significantly associated with late-onset Alzheimer disease (LOAD) in a GWAS study with 492 LOAD cases and 498 cognitive controls using Illumina's HumanHap550 beadchip.                                                                                                                                                                                |
| <a href="http://bio2rdf.org/dbsnp:rs2061333">http://bio2rdf.org/dbsnp:rs2061333</a>   | ZNF225 | GWAS results: Genome-wide association study implicates a chromosome 12 risk locus for late-onset Alzheimer disease. (Initial Sample Size: 492 cases, 496 controls; Replication Sample Size: 238 cases, 220                                                                                                                                                             |

|                                                                                     |        |                                                                                                                                                                                         |
|-------------------------------------------------------------------------------------|--------|-----------------------------------------------------------------------------------------------------------------------------------------------------------------------------------------|
|                                                                                     |        | controls); (Region: 19q13.31; Reported Gene(s): ZNF224; Risk Allele: rs2061333-?); (p-value= 0.000002). This variant is associated with Alzheimer's disease.                            |
| <a href="http://bio2rdf.org/dbsnp:rs2061333">http://bio2rdf.org/dbsnp:rs2061333</a> | ZNF225 | This variant is significantly associated with late-onset Alzheimer disease (LOAD) in a GWAS study with 492 LOAD cases and 498 cognitive controls using Illumina's HumanHap550 beadchip. |
| <a href="http://bio2rdf.org/dbsnp:rs2061332">http://bio2rdf.org/dbsnp:rs2061332</a> | ZNF225 | This variant is significantly associated with late-onset Alzheimer disease (LOAD) in a GWAS study with 492 LOAD cases and 498 cognitive controls using Illumina's HumanHap550 beadchip. |
| <a href="http://bio2rdf.org/dbsnp:rs3746319">http://bio2rdf.org/dbsnp:rs3746319</a> | ZNF225 | This variant is significantly associated with late-onset Alzheimer disease (LOAD) in a GWAS study with 492 LOAD cases and 498 cognitive controls using Illumina's HumanHap550 beadchip. |
| <a href="http://bio2rdf.org/dbsnp:rs3807031">http://bio2rdf.org/dbsnp:rs3807031</a> | ZNRD1  | This variant is significantly associated with late-onset Alzheimer disease (LOAD) in a GWAS study with 492 LOAD cases and 498 cognitive controls using Illumina's HumanHap550 beadchip. |

-----

Q11. An APOE variant is strongly correlated with AD predisposition. Are there drug classes and drugs that target APOE?

SPARQL

PREFIX pharmgkb: <<http://bio2rdf.org/pharmgkb:>>

```

SELECT DISTINCT ?drug_name
WHERE {
  GRAPH <pharmgkb> {
    ?association rdf:type pharmgkb:DrugGeneVariantInteraction .
    ?association pharmgkb:description ?description .
    ?association pharmgkb:disease ?disease .
    ?association pharmgkb:variant ?variant .
    ?disease rdfs:label ?disease_name .
    FILTER regex(?disease_name, "alzheimer", "i") .
    ?association pharmgkb:gene ?gene .
    ?gene dc:identifier "APOE" .
    ?a2 a pharmgkb:Association .
    ?a2 pharmgkb:gene ?gene .
    ?a2 pharmgkb:disease ?d2 .
    ?d2 rdfs:label ?disease2_name .
    FILTER regex(?disease2_name, "alzheimer", "i") .
  }

```

Supplement 01 (v03) to "The Translational Medicine Ontology and Knowledge Base: Driving personalized medicine by bridging the gap between bench and bedside", Joanne S. Luciano et al., JBMS, Bio-Ontologies 2010 (2011)

```

    ?a2 pharmgkb:drug ?drug .
    ?drug rdfs:label ?drug_name .
  }
}
ORDER BY ASC(?drug_name)

```

Results

|           |
|-----------|
| drug_name |
|-----------|

-----

Q12. Which existing marketed drugs might potentially be re-purposed for AD because they are known to modulate genes that are implicated in the disease?

PREFIX pharmgkb: <http://bio2rdf.org/pharmgkb:>

```

SELECT DISTINCT ?drug_name ?disease2_name
WHERE {
  GRAPH <pharmgkb> {
    ?association rdf:type pharmgkb:DrugGeneVariantInteraction .
    ?association pharmgkb:description ?description .
    ?association pharmgkb:disease
    <http://bio2rdf.org/pharmgkb:1aa122e7b0687fa04b895ee82d6b6476> .
    ?association pharmgkb:variant ?variant .
    ?association pharmgkb:gene ?gene .
    ?gene dc:identifier ?gene_name .
    ?a2 a pharmgkb:Association .
    ?a2 pharmgkb:gene ?gene .
    ?a2 pharmgkb:disease ?d2 .
    ?d2 rdfs:label ?disease2_name .
    ?a2 pharmgkb:drug ?drug .
    ?drug rdfs:label ?drug_name .
  }
}
ORDER BY ASC(?drug_name) ASC(?disease2_name)

```

Results

| drug_name             | disease2_name                |
|-----------------------|------------------------------|
| (s)-rolipram          | Autistic Disorder            |
| (s)-rolipram          | Bipolar Disorder             |
| (s)-rolipram          | Depression                   |
| (s)-rolipram          | Schizophrenia                |
| ACE INHIBITORS, PLAIN | Abnormalities                |
| ACE INHIBITORS, PLAIN | Alcoholism                   |
| ACE INHIBITORS, PLAIN | Alzheimer Disease            |
| ACE INHIBITORS, PLAIN | Angioneurotic Edema          |
| ACE INHIBITORS, PLAIN | Cardiovascular Abnormalities |

Supplement 01 (v03) to "The Translational Medicine Ontology and Knowledge Base: Driving personalized medicine by bridging the gap between bench and bedside", Joanne S. Luciano et al., JBMS, Bio-Ontologies 2010 (2011)

|                                                         |                                          |
|---------------------------------------------------------|------------------------------------------|
| ACE INHIBITORS, PLAIN                                   | Cardiovascular Diseases                  |
| ACE INHIBITORS, PLAIN                                   | Coronary Disease                         |
| ACE INHIBITORS, PLAIN                                   | Cough                                    |
| ACE INHIBITORS, PLAIN                                   | Fetal Death                              |
| ACE INHIBITORS, PLAIN                                   | Heart Failure                            |
| ACE INHIBITORS, PLAIN                                   | Hypertension                             |
| ACE INHIBITORS, PLAIN                                   | Hypertrophy, Left Ventricular            |
| ACE INHIBITORS, PLAIN                                   | Kidney Diseases                          |
| ACE INHIBITORS, PLAIN                                   | nondiabetic proteinuric nephropathy      |
| ANGIOTENSIN II ANTAGONISTS AND CALCIUM CHANNEL BLOCKERS | Cardiovascular Diseases                  |
| ANGIOTENSIN II ANTAGONISTS AND CALCIUM CHANNEL BLOCKERS | Hypertension                             |
| ANTIPSYCHOTICS                                          | Schizophrenia                            |
| BETA BLOCKING AGENTS                                    | Abnormalities                            |
| BETA BLOCKING AGENTS                                    | Cardiovascular Abnormalities             |
| BETA BLOCKING AGENTS                                    | Fetal Death                              |
| atenolol                                                | Hypertension                             |
| atenolol                                                | glomerulosclerosis                       |
| benazepril                                              | Diabetes Mellitus, Non-Insulin-Dependent |
| benazepril                                              | Hypertension                             |
| benazepril                                              | Proteinuria                              |
| captopril                                               | Hypertension                             |
| cilazapril                                              | Cough                                    |
| enalapril                                               | Arteriosclerosis                         |
| enalapril                                               | Hypertension                             |
| enalapril                                               | glomerular disease                       |
| enalapril                                               | glomerulosclerosis                       |
| epoetin alfa                                            | Kidney Failure                           |
| ethanol                                                 | Alcoholism                               |
| fluvastatin                                             | Arteriosclerosis                         |
| gemfibrozil                                             | visceral obesity                         |
| hydrochlorothiazide                                     | Hypertension                             |
| irbesartan                                              | Hypertension                             |
| lisinopril                                              | Diabetes Mellitus, Insulin-Dependent     |
| lisinopril                                              | Hypertension                             |
| nifedipine                                              | Hypertension                             |
| perindopril                                             | Cardiovascular Diseases                  |
| perindopril                                             | Cerebrovascular Accident                 |
| perindopril                                             | Dementia                                 |
| perindopril                                             | Diabetes Mellitus, Non-Insulin-Dependent |
| perindopril                                             | Hypertension                             |
| perindopril                                             | Memory Disorders                         |
| perindopril                                             | Proteinuria                              |
| pravastatin                                             | Coronary Arteriosclerosis                |

-----

Q13. What are the results of Georg Steffen Möller's lipid panel?

SPARQL

PREFIX tmo: <tag:eric@w3.org:2009/tmo/translator#>

PREFIX foaf: <http://xmlns.com/foaf/0.1/>

SELECT ?date ?value ?units ?referrer ?referred\_to ?clinic

```
WHERE {
  ?patient foaf:name "Georg Steffen Möller" .
  ?encounter tmo:patient ?patient ;
    tmo:dateOfEncounter ?date ;
    tmo:test ?referral .
  ?referral tmo:physicianNotes ?notes ;
    tmo:testType tmo:Laboratory ;
    tmo:testName "Lipid panel" ;
    tmo:CPT ?cpt ;
    tmo:referredTo ?referred_to ;
    tmo:referredClinic ?clinic ;
    tmo:referredBy ?referrer ;
    tmo:testSet ?panel .
  ?panel a tmo:LipidPanel ;
    tmo:testCode ?code .
  ?code tmo:description "Low-density lipoprotein" ;
    tmo:value ?value ;
    tmo:units ?units .
}
```

Results

| date       | value | units  | referrer       | referred_to    | clinic      |
|------------|-------|--------|----------------|----------------|-------------|
| 2008-05-06 | 4     | mmol/l | David Winziski | Daniel Schmidt | Herzzentrum |
| 2008-05-06 | 4     | mmol/l | David Winziski | Daniel Schmidt | Herzzentrum |

-----

Q14. What is Monica Mary Mall's platelet count over time?

SPARQL

PREFIX tmo: <tag:eric@w3.org:2009/tmo/translator#>

PREFIX foaf: <http://xmlns.com/foaf/0.1/>

SELECT ?date ?value ?units

```
WHERE {
  ?encounter tmo:patient [ foaf:name "Monica Mary Mall" ] ;
    tmo:dateOfEncounter ?date ;
    tmo:test [
```

Supplement 01 (v03) to "The Translational Medicine Ontology and Knowledge Base: Driving personalized medicine by bridging the gap between bench and bedside", Joanne S. Luciano et al., JBMS, Bio-Ontologies 2010 (2011)

```

    tmo:testSet [
      tmo:testCode [
        tmo:description "Platelet Count" ;
        tmo:value ?value ;
        tmo:units ?units
      ]
    ]
  ]
}
ORDER BY DESC(?date)

```

### Results

| date       | value | units |
|------------|-------|-------|
| 2009-07-20 | 290   | K/mcL |
| 2008-07-20 | 290   | K/mcL |
| 2008-03-18 | 291   | K/mcL |
| 2007-07-18 | 291   | K/mcL |
| 2006-07-20 | 297   | K/mcL |
| 2005-07-20 | 291   | K/mcL |
| 2004-07-20 | 291   | K/mcL |
